# Supplementary material for: Prospective validation study of prognostic biomarkers to predict adverse outcomes in patients with COVID-19: a study protocol
Source: PubMed Central journal article supplement — BMJ Open. 2021 Jan 6;11(1):e044497. doi: 10.1136/bmjopen-2020-044497 (PMC7789210; doi:10.1136/bmjopen-2020-044497), 2021-01-06
Supplement: bmjopen-2020-044497.draft_revisions.pdf [file bmjopen-2020-044497.draft_revisions.pdf]

# BMJ Open

BMJ Open is committed to open peer review. As part of this commitment we make the peer review history of every article we publish publicly available.

When an article is published we post the peer reviewers' comments and the authors' responses online. We also post the versions of the paper that were used during peer review. These are the versions that the peer review comments apply to.

The versions of the paper that follow are the versions that were submitted during the peer review process. They are not the versions of record or the final published versions. They should not be cited or distributed as the published version of this manuscript.

BMJ Open is an open access journal and the full, final, typeset and author-corrected version of record of the manuscript is available on our site with no access controls, subscription charges or pay-per-view fees (<http://bmjopen.bmj.com>).

If you have any questions on BMJ Open's open peer review process please email [info.bmjopen@bmj.com](mailto:info.bmjopen@bmj.com)

# BMJ Open

## Peripheral artery disease at the time of dialysis initiation and mortality: a prospective observational multicenter study

|                               |                                                                                                                                                                                                                                                                               |
|-------------------------------|-------------------------------------------------------------------------------------------------------------------------------------------------------------------------------------------------------------------------------------------------------------------------------|
| Journal:                      | <i>BMJ Open</i>                                                                                                                                                                                                                                                               |
| Manuscript ID                 | bmjopen-2020-042315                                                                                                                                                                                                                                                           |
| Article Type:                 | Original research                                                                                                                                                                                                                                                             |
| Date Submitted by the Author: | 01-Jul-2020                                                                                                                                                                                                                                                                   |
| Complete List of Authors:     | Morooka, Hikaru; Nagoya University Hospital, Nephrology<br>Tanaka, Akihito; Nagoya University Hospital, Nephrology<br>Inaguma, D.; Fujita Health University, Nephrology<br>Maruyama, Shoichi; Nagoya Daigaku Daigakuin Igakukei Kenkyuka<br>Igakubu, Department of Nephrology |
| Keywords:                     | Chronic renal failure < NEPHROLOGY, Dialysis < NEPHROLOGY, Vascular medicine < INTERNAL MEDICINE                                                                                                                                                                              |
|                               |                                                                                                                                                                                                                                                                               |

SCHOLARONE™  
Manuscripts

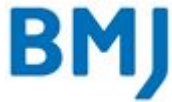

I, the Submitting Author has the right to grant and does grant on behalf of all authors of the Work (as defined in the below author licence), an exclusive licence and/or a non-exclusive licence for contributions from authors who are: i) UK Crown employees; ii) where BMJ has agreed a CC-BY licence shall apply, and/or iii) in accordance with the terms applicable for US Federal Government officers or employees acting as part of their official duties; on a worldwide, perpetual, irrevocable, royalty-free basis to BMJ Publishing Group Ltd ("BMJ") its licensees and where the relevant Journal is co-owned by BMJ to the co-owners of the Journal, to publish the Work in this journal and any other BMJ products and to exploit all rights, as set out in our [licence](#).

The Submitting Author accepts and understands that any supply made under these terms is made by BMJ to the Submitting Author unless you are acting as an employee on behalf of your employer or a postgraduate student of an affiliated institution which is paying any applicable article publishing charge ("APC") for Open Access articles. Where the Submitting Author wishes to make the Work available on an Open Access basis (and intends to pay the relevant APC), the terms of reuse of such Open Access shall be governed by a Creative Commons licence – details of these licences and which [Creative Commons](#) licence will apply to this Work are set out in our licence referred to above.

Other than as permitted in any relevant BMJ Author's Self Archiving Policies, I confirm this Work has not been accepted for publication elsewhere, is not being considered for publication elsewhere and does not duplicate material already published. I confirm all authors consent to publication of this Work and authorise the granting of this licence.

1  
2  
3 **Peripheral artery disease at the time of dialysis initiation and mortality: a prospective**  
4 **observational multicenter study**  
5  
6  
7  
8  
9

10 Hikaru Morooka,<sup>1</sup> Akihito Tanaka,<sup>1</sup> Daijo Inaguma<sup>2</sup>, Shoichi Maruyama<sup>3</sup>  
11  
12  
13

14 <sup>1</sup>Division of Nephrology, Nagoya University Hospital, Nagoya, Japan  
15  
16

17 <sup>2</sup> Division of Nephrology, Fujita Health University School of Medicine, Toyoake, Japan  
18  
19

20 <sup>3</sup>Division of Nephrology, Nagoya University Graduate School of Medicine, Nagoya, Japan  
21  
22  
23

24 **Corresponding author:** Akihito Tanaka  
25

26 Division of Nephrology,  
27

28 Nagoya University Hospital  
29

30 Tsurumaicho, 65, Showa Ward, Nagoya, Aichi, Japan  
31  
32

33 Tel: +81-52-741-2111  
34

35 Fax: +81-52-744-2209  
36

37 E-mail: [tanaka17@med.nagoya-u.ac.jp](mailto:tanaka17@med.nagoya-u.ac.jp)  
38  
39  
40  
41

42 Word count: 2014.  
43  
44  
45  
46  
47  
48  
49  
50  
51  
52  
53  
54  
55  
56  
57  
58  
59  
60

## ABSTRACT

**Objectives:** Patients with peripheral artery disease (PAD) are reported to have a poorer prognosis than those without PAD. PAD is sometimes found at dialysis initiation, but its influence on the prognosis in these patients has not been investigated. We aimed to compare the mortality between patients with PAD at the time of dialysis initiation and those without PAD.

**Design:** We undertook an observational prospective multicenter study of patients starting dialysis therapy. Data were collected on patients' sex, age, presence of PAD, medication, past medical history, and clinical and laboratory data.

**Setting:** Seventeen centers participating in the Aichi Cohort Study of Prognosis in Patients Newly Initiated into Dialysis.

**Participants:** A total of 1524 patients with chronic kidney disease who started dialysis from October 2011 to September 2013. The patients were followed up until March 2015.

**Primary and secondary outcome measures:** The primary outcome was defined as all-cause death. The secondary outcomes were defined as each cause of death.

**Results:** The study included 1030 men and 492 women with a mean age of  $67.5 \pm 13.1$  years. Of these, 71 had PAD, and 1451 did not. After a median follow-up of 814.5 days, 33.8 % of the former and 17.0 % of the latter group had died by March 2015 ( $p < 0.01$ ). After adjusting for confounding factors, PAD at dialysis initiation remained an independent risk factor for mortality ( $p < 0.01$ ).

**Conclusions:** Patients with PAD at the time of dialysis initiation had a poorer prognosis than patients without PAD. Therefore, the presence of PAD in patients starting dialysis should be considered in their monitoring and follow-up.

**Key words:** Chronic kidney diseases; Dialysis; Mortality; Peripheral artery disease

## STRENGTHS AND LIMITATIONS OF THIS STUDY

- This observational prospective multicenter study analyzed data in patients at the beginning of dialysis and for a median follow-up of 814.5 days.
- Our study had a high follow-up rate (only two patients lost to follow-up) and a well-defined population with comprehensive data at the start of dialysis.
- The number of patients with PAD at the initiation of dialysis was comparably small, and not all of them underwent peripheral angiography to confirm the diagnosis.

## INTRODUCTION

The number of patients receiving dialysis therapy is increasing every year, and these patients have a high mortality risk from various causes, particularly cardiovascular diseases (CVD).[1, 2] End-stage kidney disease (ESKD) represents a considerable risk of atherosclerosis, and patients on dialysis tend to have further risk factors contributing to the rapid deterioration of CVD.[3] While CVD, including stroke, and coronary artery disease have been reported in more detail in patients on dialysis,[4-6] the problem of peripheral artery disease (PAD) in patients undergoing dialysis therapy has been less frequently addressed. With both aging and a growing number of diabetic patients on dialysis, the prevalence of PAD among these patients is likely to increase year by year.[7] PAD with distal lesions is more common in patients with ESKD, making the transarterial approach to the stenosis sometimes difficult.[8, 9] Furthermore, a vascular stenosis can promote peripheral ischemic skin ulcers or gangrene, leading to an intractable pathology. Thus, patients with PAD on dialysis therapy have a worse prognosis than those without PAD.[10] Consequently, there is an urgent need to clarify the relationships between PAD and mortality in patients on dialysis. Furthermore, to improve the prognosis of dialysis patients, it is crucial to understand the characteristics of those with high mortality risk.

The classic atherosclerosis risk factors, such as age, smoking, diabetes, hypertension, and hyperlipidemia, are common in patients with ESKD, but their chronic kidney disease (CKD) condition adds unique risk factors that promote PAD: chronic inflammation, hypoalbuminemia, and a pro-calcific state. PAD in ESKD patients markedly increases the possibility of myocardial ischemia and stroke, and is the main cause of limb loss and mortality, the rates of which are much higher than those in the general population.[10,11] Moreover, it has been pointed out that if patients with PAD develop critical limb ischemia,

1  
2  
3 their overall survival is worse than that of patients with malignant tumors.[12] Hence, when  
4  
5 considering the prognosis of patients receiving dialysis, the presence of PAD is important.  
6  
7

8         There are few recent reports on PAD in patients with ESKD at the time of dialysis  
9  
10 initiation. Several studies have investigated patients receiving maintenance dialysis. In these  
11  
12 studies, descriptive data included the prognosis of “only maintenance dialysis” patients.[10,  
13  
14 13-15] According to them, PAD had an overall prevalence of 18.2 %, and the patient survival  
15  
16 rate was 28.6 % during 8.8 years in the PAD group. Moreover, since these studies focused on  
17  
18 patients on maintenance dialysis, they mainly addressed PAD that occurred during dialysis.  
19  
20 However, renal function in patients with CKD may decrease during the treatment of PAD. At  
21  
22 other times, PAD is found when investigating the cause of renal function deterioration or  
23  
24 when screening patients for their eligibility for a renal transplant. PAD at the time of dialysis  
25  
26 initiation is a complex and clinically relevant problem.  
27  
28  
29

30         In the present study, we compared PAD and non-PAD patients who had started  
31  
32 dialysis therapy in the Aichi prefecture to identify the mortality associated with PAD in  
33  
34 ESKD patients at the time of initiation of dialysis therapy.  
35  
36  
37  
38  
39

## 40 **PATIENTS AND METHODS**

### 41 **Patient registration and data collection**

42  
43 Data from the Aichi Cohort Study of Prognosis in Patients Newly Initiated into Dialysis [14,  
44  
45 16] were used in this prospective multicenter study. Patients who started dialysis between  
46  
47 October 2011 and September 2013 at 17 Japanese institutions were eligible for participation.  
48  
49 This study was approved by the Ethics Committee of the Institutional Review Board in  
50  
51 Nagoya University (Approval number 1335), and all patients provided written informed  
52  
53 consent.  
54  
55  
56  
57  
58  
59  
60



1  
2  
3 First, we screened all patients with ESKD who were initiated dialysis. Only patients who  
4 became stable and were discharged or transferred from the hospital were included. Patients  
5 who were not discharged and died in the hospital were excluded (Figure 1). Data regarding  
6 patients' demographics, medical history, comorbidities, medications, and laboratory data  
7 during the period of dialysis initiation were collected. PAD was clinically diagnosed based on  
8 symptoms, physical findings, and various examinations, but not all patients received  
9 angiography for diagnosis. We used the Fontaine classification for grading of severity.[17]  
10 The presence of PAD was defined as a Fontaine stage II or higher. Laboratory data were  
11 obtained immediately prior to the first dialysis session. Patients were followed until the end  
12 of March 2015.  
13  
14  
15  
16  
17  
18  
19  
20  
21  
22  
23  
24  
25  
26  
27  
28

### 29 **Patient and public involvement**

30 Patients were not involved at any stage of the research for this study.  
31  
32  
33  
34

### 35 **Mortality**

36 Patients were divided into one group with PAD and one group without PAD. The primary  
37 endpoint was all-cause mortality. Causes of death were recorded to the extent possible. The  
38 occurrence of death was investigated via survey slips sent to the dialysis facilities at the end  
39 of March 2015.  
40  
41  
42  
43  
44  
45  
46

47 We compared the outcomes and hazard ratios (HRs) between the two groups.  
48  
49  
50

### 51 **Statistics**

52 Baseline characteristics were presented descriptively and compared between the two groups  
53 using the Student's *t*-test or  $\chi^2$ -test. Survival was presented graphically using the  
54 Kaplan-Meier method and analyzed using uni- and multivariate Cox regression. HRs were  
55  
56  
57  
58  
59  
60

1  
2  
3 calculated and presented graphically using forest plots. We used propensity score matching to  
4  
5 account for differences in baseline characteristics between the two groups. The propensity  
6  
7 score was calculated based on age, sex, presence of diabetes, medication (use of statins,  
8  
9 angiotensin-converting enzyme inhibitors, angiotensin-receptor blockers, beta blockers, and  
10  
11 antiplatelets), laboratory data (levels of phosphorus, hemoglobin, and estimated glomerular  
12  
13 filtration rate), and history of coronary artery disease.  
14  
15

16  
17 P-values of  $< 0.05$  were considered to be statistically significant. We used the R software  
18  
19 (version 4.0.0, R Foundation for Statistical Computing, Vienna, Austria, URL  
20  
21 <http://www.R-project.org/>) for all statistical analysis. For the propensity score matching, the  
22  
23 R-package MatchIt (1:3 matching with the nearest neighbor) was used.[18] Missing data  
24  
25 were not complemented, however the characteristics we used for propensity score matching  
26  
27 were not missing.  
28  
29  
30  
31  
32

## 33 RESULTS

### 34 Baseline characteristics

35  
36 Patients' baseline characteristics are shown in Table 1. The initial population included 1524  
37  
38 participants, of whom 1032 were men, and 492 were women. The mean age was  $67.5 \pm 13.1$   
39  
40 years. Two patients were untraceable and lost to follow-up. Of the remaining 1522 patients,  
41  
42 71 (4.7%) had PAD, and 1451 did not. There were significant differences between patients  
43  
44 with and without PAD with regard to comorbidities and drug use. Antiplatelet administration  
45  
46 was significantly more frequent in those with PAD than in those without PAD. This may be  
47  
48 because treatment for PAD includes antiplatelets. The prevalence of diabetes mellitus,  
49  
50 coronary artery disease, and aortic dissection was significantly higher in those with than in  
51  
52 those without PAD. Patients with PAD had significantly lower ejection fractions than patients  
53  
54 without PAD. The use of both beta-blockers and statins was significantly higher in patients  
55  
56  
57  
58  
59  
60

with PAD than in those without PAD (beta-blockers: 34.0 % and 47.9 %, respectively,  $p = 0.024$ ; statins: 39.4 % and 53.5 %, respectively,  $p = 0.024$ ). The estimated glomerular filtration rate [19] was significantly higher in patients with PAD than in those without PAD ( $6.34 \pm 1.83$  mL/min per  $1.7 \text{ m}^2$  and  $5.40 \pm 2.23$  mL/min per  $1.7 \text{ m}^2$ , respectively,  $p < 0.001$ ). The median follow-up was 814.5 days (interquartile range 645-1037).

## Mortality

During the follow-up period, 271 patients died from various causes, including cardiovascular events (102 patients, 37.6 %), infectious disease (56 patients, 20.7 %), cancer (45 patients, 16.6 %), and other causes. The PAD group had a significantly higher mortality rate of 33.8 % than the group without PAD with 17.0 % ( $p < 0.01$ ; Table 1). Figure 2 shows the Kaplan-Meier plot for all-cause mortality in patients with and without PAD.

**Table 1.** Baseline and clinical characteristics and outcomes of patients starting dialysis (n = 1522)

|                         | Patients without PAD(n =<br>1451) | Patients with PAD (n=<br>71) | P value |
|-------------------------|-----------------------------------|------------------------------|---------|
| Female (%)              | 33.1                              | 16.9                         | 0.007   |
| Age (years) (mean (SD)) | 67.4 (13.1)                       | 69.9 (12.1)                  | 0.106   |
| <b>Past history</b>     |                                   |                              |         |
| Diabetes (%)            | 50.2                              | 67.6                         | 0.006   |
| CAD (%)                 | 15.9                              | 36.6                         | <0.001  |
| PCI (%)                 | 9.6                               | 21.1                         | 0.003   |
| CABG (%)                | 3.8                               | 14.1                         | <0.001  |
| Aortic dissection (%)   | 5.0                               | 15.5                         | <0.001  |
| Admission of HF (%)     | 19.4                              | 42.3                         | <0.001  |
| Stroke (%)              | 9.1                               | 7.0                          | 0.704   |

|                                                |                   |                   |        |
|------------------------------------------------|-------------------|-------------------|--------|
| <b>Cause of CKD</b>                            |                   |                   | 0.294  |
| <b>Diabetes (%)</b>                            | 42.5              | 59.2              |        |
| <b>Nephrosclerosis (%)</b>                     | 25.3              | 25.4              |        |
| <b>CGN (%)</b>                                 | 15.6              | 4.2               |        |
| <b>Others, unknown (%)</b>                     | 4.3               | 4.2               |        |
| <b>Vital data</b>                              |                   |                   |        |
| <b>Pre-dialysis SBP (mmHg)<br/>(mean (SD))</b> | 151.1 (25.9)      | 151.7 (29.5)      | 0.843  |
| <b>Cardiac ultrasonography</b>                 |                   |                   |        |
| <b>EF (%) (mean (SD))</b>                      | 60.9 (12.2)       | 55.8 (13.7)       | 0.001  |
| <b>Chest X-ray</b>                             |                   |                   |        |
| <b>CTR (%) (mean (SD))</b>                     | 55.2 (7.2)        | 55.2 (7.1)        | 0.973  |
| <b>Administration</b>                          |                   |                   |        |
| <b>ARB or ACEI (%)</b>                         | 60.6              | 56.3              | 0.554  |
| <b>BB (%)</b>                                  | 34.0              | 47.9              | 0.024  |
| <b>Statin (%)</b>                              | 39.4              | 53.5              | 0.024  |
| <b>VDRA (%)</b>                                | 26.9              | 29.6              | 0.726  |
| <b>Antiplatelets (%)</b>                       | 28.9              | 56.3              | <0.001 |
| <b>ESA (%)</b>                                 | 85.8              | 87.3              | 0.861  |
| <b>Laboratory data</b>                         |                   |                   |        |
| <b>WBC (/uL) (mean (SD))</b>                   | 6729.88 (3130.80) | 7206.62 (3581.54) | 0.214  |
| <b>Hb (g/dL) (mean (SD))</b>                   | 9.37 (1.55)       | 9.40 (1.45)       | 0.887  |
| <b>Plt (10 000/uL) (mean (SD))</b>             | 18.24 (7.62)      | 18.17 (8.19)      | 0.943  |
| <b>Alb (g/dL) (mean (SD))</b>                  | 3.21 (0.59)       | 3.02 (0.62)       | 0.010  |
| <b>BUN (mg/dL) (mean (SD))</b>                 | 92.02 (30.69)     | 86.68 (24.84)     | 0.149  |

|                                                    |                  |                 |        |
|----------------------------------------------------|------------------|-----------------|--------|
| <b>Cr (mg/dL) (mean (SD))</b>                      | 9.03 (3.24)      | 7.74 (2.22)     | 0.001  |
| <b>eGFR (mL/min/1.73m<sup>2</sup>) (mean (SD))</b> | 5.40 (2.23)      | 6.34 (1.83)     | 0.001  |
| <b>Na (mEq/L) (mean (SD))</b>                      | 137.88 (4.41)    | 137.93 (3.91)   | 0.933  |
| <b>K (mEq/L) (mean (SD))</b>                       | 4.56 (0.84)      | 4.43 (0.81)     | 0.194  |
| <b>Adjusted Ca (mg/dL) (mean (SD))</b>             | 8.59 (1.06)      | 9.06 (0.93)     | <0.001 |
| <b>P (mg/dL) (mean (SD))</b>                       | 6.40 (1.89)      | 5.76 (1.56)     | 0.005  |
| <b>Mg (mg/dL) (mean (SD))</b>                      | 2.15 (0.49)      | 2.17 (0.44)     | 0.826  |
| <b>UA (mg/dL) (mean (SD))</b>                      | 8.80 (2.44)      | 8.64 (2.27)     | 0.582  |
| <b>LDL C (mg/dL) (mean (SD))</b>                   | 89.97 (34.25)    | 87.08 (37.14)   | 0.525  |
| <b>CRP (mg/dL) (mean (SD))</b>                     | 1.82 (4.14)      | 2.39 (4.68)     | 0.271  |
| <b>β2MG (ng/dL) (mean (SD))</b>                    | 19.32 (5.78)     | 17.33 (5.05)    | 0.027  |
| <b>TSAT (%) (mean (SD))</b>                        | 27.16 (16.60)    | 25.44 (17.95)   | 0.438  |
| <b>Ferritin (ng/dL) (mean (SD))</b>                | 222.28 (1009.80) | 226.65 (395.74) | 0.972  |
| <b>Outcome</b>                                     |                  |                 |        |
| <b>Infection-related death (%)</b>                 | 3.4              | 8.5             | 0.062  |
| <b>CVD-related death (%)</b>                       | 6.6              | 11.6            | 0.167  |
| <b>All-cause death (%)</b>                         | 17.0             | 33.8            | 0.001  |

ACEI; angiotensin-converting enzyme inhibitor. Adjusted Ca; adjusted calcium. Alb; albumin. ARB; angiotensin receptor blocker. BB; beta blocker. BUN; blood urea nitrogen. β 2MG; beta-2 microglobulin. Ca; calcium. CABG; coronary artery bypass grafting. CAD; coronary artery disease. CGN; chronic glomerulonephritis. CKD; chronic kidney disease. Cr; creatinine. CRP; C-reactive protein. CTR; cardiothoracic ratio. CVD; cardiovascular disease. EF; ejection fraction. eGFR; estimated glomerular filtration rate. ESA; erythropoietin stimulating agent. Hb; hemoglobin. HF; heart failure. K; potassium. LDL-C; low-density

lipoprotein cholesterol. Mg; magnesium. Na; sodium. P; phosphate. PAD; peripheral arterial disease. PCI; percutaneous coronary intervention. Plt; platelet. SBP; systolic blood pressure. SD; standard deviation. TSAT; transferrin saturation. UA; uric acid. VDRA; Vitamin D receptor agonist. WBC; white blood cells.

Figure 3 shows the Kaplan-Meier plot for CVD-related mortality in patients with and without PAD. The former group had a significantly higher mortality rate than the latter group ( $p = 0.048$ ). Figure 4 shows the Kaplan-Meier plot for infection-related mortality in patients with and without PAD. The former group had a significantly higher mortality rate than the latter group ( $p = 0.011$ ). Figure 5 shows the forest plot for the HRs of PAD for all-cause death with adjustment for confounding factors. PAD was an independent risk factor for death (HR, 1.76; 95 % confidence interval, 1.15–2.69;  $p < 0.01$ ).

### Propensity score-matched comparison between patients with and without PAD

The baseline and clinical characteristics in Table 1 showed significant differences between patients in the group with and without PAD, suggesting that there was a possibility of bias. Table 2 shows the baseline characteristics of the propensity score-matched patients with ( $n=71$ ) and without PAD ( $n=213$ ).

**Table 2.** Baseline and clinical characteristics and outcomes of propensity-score matched patients starting dialysis ( $n = 284$ )

|                         | Patients without PAD (n = 213) | Patients with PAD (n = 71) | P value |
|-------------------------|--------------------------------|----------------------------|---------|
| Female (%)              | 15.0                           | 16.9                       | 0.850   |
| Age (years) (mean (SD)) | 69.1 (12.2)                    | 69.9 (12.1)                | 0.607   |
| Past history            |                                |                            |         |

|                                                |                   |                   |       |
|------------------------------------------------|-------------------|-------------------|-------|
| <b>DM (%)</b>                                  | 67.1              | 67.6              | 1.000 |
| <b>CAD (%)</b>                                 | 40.4              | 36.6              | 0.674 |
| <b>PCI (%)</b>                                 | 26.8              | 21.1              | 0.431 |
| <b>CABG (%)</b>                                | 9.9               | 14.1              | 0.442 |
| <b>Aortic dissection (%)</b>                   | 7.0               | 15.5              | 0.057 |
| <b>Admission of HF (%)</b>                     | 29.1              | 42.3              | 0.057 |
| <b>Stroke (%)</b>                              | 14.1              | 7.0               | 0.175 |
| <b>Cause of CKD</b>                            |                   |                   | 0.091 |
| <b>Diabetes (%)</b>                            | 58.7              | 59.2              |       |
| <b>Nephrosclerosis (%)</b>                     | 25.4              | 25.4              |       |
| <b>CGN (%)</b>                                 | 8.5               | 4.2               |       |
| <b>Others, unknown (%)</b>                     | 2.3               | 4.2               |       |
| <b>Vital data</b>                              |                   |                   |       |
| <b>Pre-dialysis SBP (mmHg)<br/>(mean (SD))</b> | 151.8 (28.3)      | 151.7 (29.5)      | 0.977 |
| <b>Cardiac ultrasonography</b>                 |                   |                   |       |
| <b>EF (%) (mean (SD))</b>                      | 59.8 (13.8)       | 55.8 (13.7)       | 0.049 |
| <b>Chest X-ray</b>                             |                   |                   |       |
| <b>CTR (%) (mean (SD))</b>                     | 55.3 (6.8)        | 55.2 (7.1)        | 0.885 |
| <b>Administration</b>                          |                   |                   |       |
| <b>ARB or ACEI (%)</b>                         | 59.2              | 56.3              | 0.781 |
| <b>BB (%)</b>                                  | 49.3              | 47.9              | 0.945 |
| <b>Statin (%)</b>                              | 58.7              | 53.5              | 0.533 |
| <b>VDRA (%)</b>                                | 27.2              | 29.6              | 0.819 |
| <b>Antiplatelets (%)</b>                       | 58.2              | 56.3              | 0.89  |
| <b>ESA (%)</b>                                 | 89.7              | 87.3              | 0.742 |
| <b>Laboratory data</b>                         |                   |                   |       |
| <b>WBC (/uL) (mean (SD))</b>                   | 6704.76 (2722.41) | 7206.62 (3581.54) | 0.217 |

|                                                    |                 |                 |       |
|----------------------------------------------------|-----------------|-----------------|-------|
| <b>Hb (g/dL) (mean (SD))</b>                       | 9.62 (1.43)     | 9.40 (1.45)     | 0.275 |
| <b>Plt (10 000/uL) (mean (SD))</b>                 | 17.90 (7.39)    | 18.17 (8.19)    | 0.796 |
| <b>Alb (g/dL) (mean (SD))</b>                      | 3.20 (0.60)     | 3.02 (0.62)     | 0.032 |
| <b>BUN (mg/dL) (mean (SD))</b>                     | 87.14 (27.58)   | 86.68 (24.84)   | 0.901 |
| <b>Cr (mg/dL) (mean (SD))</b>                      | 8.47 (2.82)     | 7.74 (2.22)     | 0.049 |
| <b>eGFR (mL/min/1.73m<sup>2</sup>) (mean (SD))</b> | 6.05 (2.47)     | 6.34 (1.83)     | 0.368 |
| <b>Na (mEq/L) (mean (SD))</b>                      | 138.36 (4.56)   | 137.93 (3.91)   | 0.475 |
| <b>K (mEq/L) (mean (SD))</b>                       | 4.51 (0.83)     | 4.43 (0.81)     | 0.492 |
| <b>Adjusted Ca (mg/dL) (mean (SD))</b>             | 8.71 (0.96)     | 9.06 (0.93)     | 0.007 |
| <b>P (mg/dL) (mean (SD))</b>                       | 5.96 (1.63)     | 5.76 (1.56)     | 0.372 |
| <b>Mg (mg/dL) (mean (SD))</b>                      | 2.22 (0.46)     | 2.17 (0.44)     | 0.497 |
| <b>UA (mg/dL) (mean (SD))</b>                      | 8.75 (2.49)     | 8.64 (2.27)     | 0.731 |
| <b>LDL C (mg/dL)(mean (SD))</b>                    | 87.07 (32.01)   | 87.08 (37.14)   | 0.999 |
| <b>CRP (mg/dL) (mean (SD))</b>                     | 1.61 (3.30)     | 2.39 (4.68)     | 0.137 |
| <b>β2MG (ug/dL) (mean (SD))</b>                    | 17.95 (5.04)    | 17.33 (5.05)    | 0.497 |
| <b>TSAT (%) (mean (SD))</b>                        | 25.41 (14.74)   | 25.44 (17.95)   | 0.992 |
| <b>Ferritin (ng/dL) (mean (SD))</b>                | 171.44 (208.99) | 226.65 (395.74) | 0.153 |
| <b>Outcome</b>                                     |                 |                 |       |
| <b>Infection-related death (%)</b>                 | 3.8             | 8.5             | 0.206 |
| <b>CVD-related death (%)</b>                       | 8.2             | 11.6            | 0.537 |
| <b>All-cause death (%)</b>                         | 21.6            | 33.8            | 0.056 |

ACEI; angiotensin-converting enzyme inhibitor. Adjusted Ca; adjusted calcium. Alb; albumin. ARB; angiotensin receptor blocker. BB; beta blocker. BUN; blood urea nitrogen. β2MG; beta-2 microglobulin. Ca; calcium. CABG; coronary artery bypass grafting. CAD; coronary artery disease. CGN; chronic glomerulonephritis. CKD; chronic kidney disease. Cr;



1  
2  
3 creatinine. CRP; C-reactive protein. CTR; cardiothoracic ratio. CVD; cardiovascular disease.  
4  
5 EF; ejection fraction. eGFR; estimated glomerular filtration rate. ESA; erythropoietin  
6  
7 stimulating agent. Hb; hemoglobin. HF; heart failure. K; potassium. LDL-C; low-density  
8  
9 lipoprotein cholesterol. Mg; magnesium. Na; sodium. P; phosphate. PAD; peripheral arterial  
10  
11 disease. PCI; percutaneous coronary intervention. Plt; platelet. SBP; systolic blood pressure.  
12  
13 SD; standard deviation. TSAT; transferrin saturation. UA; uric acid. VDRA; Vitamin D  
14  
15 receptor agonist. WBC; white blood cells.  
16  
17  
18  
19  
20  
21

22 Figure 6 shows the Kaplan-Meier plot for all-cause death in matched patients with  
23 and without PAD. Patients with PAD showed a significantly worse prognosis than those  
24 without. Figures 7 and 8 show the Kaplan-Meier plots for CVD-related and infection-related  
25 death, respectively, in matched patients with and without PAD with no significant differences  
26 between the groups. Figure 9 shows the forest plot for the HRs of matched patients with PAD  
27 for all-cause death with adjustment for confounding factors. PAD was an independent risk  
28 factor for death here, too (HR, 1.78; 95 % confidence interval, 1.07–2.95;  $p = 0.026$ ).  
29  
30  
31  
32  
33  
34  
35  
36  
37  
38  
39

## 40 DISCUSSION

41  
42 Our study showed that patients with PAD at the time of dialysis initiation had a significantly  
43 higher mortality than patients without PAD. This higher risk should be considered in the  
44 treatment and monitoring of these patients.  
45  
46  
47  
48

49 A previous study suggested that the prevalence of PAD in patients with ESKD  
50 reached almost 20 %.[15] In our cohort, the prevalence of PAD was much lower, most likely  
51 because our patients started dialysis, whereas the patients in the literature were on  
52 maintenance dialysis. This might reflect a deterioration of peripheral atherosclerosis with  
53 longer duration of dialysis. Another study suggested that the chronic uremic state is  
54  
55  
56  
57  
58  
59  
60

1  
2  
3 associated with systemic inflammation in dialysis patients, leading to hypoalbuminemia and  
4 an increased risk of PAD.[20] Hence, our results are remarkable because we showed the  
5 prevalence of PAD at the time of dialysis initiation, while past studies reported on PAD  
6 during maintenance dialysis. Furthermore, patients with PAD in our study more frequently  
7 had a decreased ejection fraction and decreased albumin and increased adjusted calcium  
8 levels than those without PAD, even after propensity score matching. We cannot exclude the  
9 possibility of other factors associated with PAD that were not corrected even after our  
10 propensity score matching. This implies that PAD is one symptom of a systemic  
11 atherosclerotic disease that affects not only the peripheral but also coronary arteries. When  
12 seeing patients with myocardial infarction or low cardiac systolic function, it is recommended  
13 to suspect that they have PAD.[7]

14  
15  
16  
17  
18  
19  
20  
21  
22  
23  
24  
25  
26  
27  
28  
29  
30  
31  
32  
33  
34  
35  
36  
37  
38  
39  
40  
41  
42  
43  
44  
45  
46  
47  
48  
49  
50  
51  
52  
53  
54  
55  
56  
57  
58  
59  
60  
In this study, patients with PAD at the time of dialysis initiation had a worse  
prognosis than patients without PAD. Patients with PAD suffered more frequently from CVD  
and infectious diseases. After propensity score matching, all-cause mortality still indicated a  
similar result. As our propensity score included a history of coronary artery disease, we could  
not show a significant difference between patients with and without PAD regarding this  
aspect. We assume that the number of patients with PAD was too small to demonstrate a  
significant difference in infection-related deaths between patients with and without PAD.  
However, these results support that atherosclerosis is likely to occur not only in the coronary  
but also in the peripheral arteries in patients with ESKD. PAD is a systemic disease, which  
can negatively affect patients' prognosis. Based on our findings, it is critical to detect patients  
with PAD at the time of dialysis initiation.

Our results should be interpreted within the limitations of our study. Firstly, as this  
was an observational study, there is an inevitable selection bias in our patients with ESKD  
and PAD. Secondly, the number of patients with PAD was small, and not all patients

1  
2  
3 underwent peripheral angiography initially. Hence, the statistical power of our results may be  
4  
5 low. Furthermore, we did not include patients with Fontaine stage I into the PAD group.  
6  
7 However, our study included a well-defined population as a strength.  
8  
9

## 10 11 12 **CONCLUSION**

13  
14 Patients with PAD at the time of dialysis initiation showed higher rates of mortality than  
15  
16 patients without PAD. Therefore, the presence of PAD in patients starting dialysis should be  
17  
18 considered in their monitoring and follow-up.  
19  
20  
21  
22

## 23 24 **Acknowledgments**

25  
26 We acknowledge the support of the following members of the Aichi Cohort Study of  
27  
28 Prognosis in Patients Newly Initiated into Dialysis (AICOPP) for this study: Hirofumi Tamai  
29  
30 (Anjo Kosei Hospital), Tomohiko Naruse (Kasugai Municipal Hospital), Kei Kurata (Tosei  
31  
32 General Hospital), Hideto Oishi (Komaki City Hospital), Isao Aoyama (Japan Community  
33  
34 Healthcare Organization Chukyo Hospital), Hiroshi Ogawa (Shinseikai Daiichi Hospital),  
35  
36 Hiroko Kushimoto (Nishichita General Hospital), Hideaki Shimizu (Chubu-Rosai Hospital),  
37  
38 Junichiro Yamamoto (Tsushima City Hospital), Hisashi Kurata (Toyota Kosei Hospital),  
39  
40 Taishi Yamakawa (Toyohashi Municipal Hospital), Takaaki Yaomura (Nagoya Medical  
41  
42 Center), Hirotake Kasuga (Nagoya Kyouritsu Hospital), Shizunori Ichida (Japanese Red  
43  
44 Cross Nagoya Daiichi Hospital), Hibiki Shinjo (Japanese Red Cross Nagoya Daini Hospital),  
45  
46 Shigehisa Koide (Fujita Health University Hospital), and Yukio Yuzawa (Fujita Health  
47  
48 University Hospital).  
49  
50  
51  
52  
53  
54  
55

## 56 57 **Individual author contributions**

58  
59  
60

1  
2  
3 DI conceived and designed the study. DI developed the bespoke dataset. AT accessed the  
4 dataset, contributed to data analysis and interpretation, and provided feedback on the article.  
5  
6  
7 HM performed the data analysis and interpretation, wrote the first draft of the article, and  
8  
9  
10 subsequent revisions. SM contributed to study design, provided feedback on the article, and  
11  
12 approved the submitted version. All authors have approved the final version for publication  
13  
14 and agree to be accountable for all aspects of the work in ensuring that questions related to  
15  
16 the accuracy or integrity of any part of the work are appropriately investigated and resolved.  
17  
18  
19 The corresponding author attests that all listed authors meet authorship criteria and that no  
20  
21 others meeting the criteria have been omitted.  
22  
23  
24  
25

### 26 **Funding**

27  
28 This research received no specific grant from any funding agency in the public, commercial,  
29  
30 or not-for-profit sectors.  
31  
32  
33  
34

### 35 **Competing interests**

36  
37 None declared.  
38  
39  
40  
41

### 42 **Data availability statement**

43  
44 No additional data are available.  
45  
46  
47  
48

### 49 **Patient and public involvement**

50  
51 No patients were involved.  
52  
53  
54  
55  
56  
57  
58  
59  
60

**REFERENCES**

1. Sato T, Sakurai H, Okubo K, et al. Current state of dialysis treatment and vascular access management in Japan. *J Vasc Access* 2019;20:10–14. doi: 10.1177/1129729819838183.
2. Masakane I, Nakai S, Ogata S, et al. An overview of regular dialysis treatment in Japan (as of 31 December 2013). *Ther Apher Dial* 2015;19:540–74. doi: 10.1111/1744-9987.12378.
3. Cozzolino M, Galassi A, Pivari F, et al. The cardiovascular burden in end-stage renal disease. *Contrib Nephrol* 2017;191:44–57. doi: 10.1159/000479250.
4. Cozzolino M, Mangano M, Stucchi A, et al. Cardiovascular disease in dialysis patients. *Nephrol Dial Transplant* 2018;33:iii28–iii34. doi: 10.1093/ndt/gfy174.
5. U.S. Renal Data System. Atlas of Chronic Kidney Disease and End-Stage Renal Disease in the United States. Bethesda, MD: National Institute of Health, National Institute of Diabetes and Digestive and Kidney Diseases 2009.
6. Seliger SL, Gillen DL, Longstreth WT Jr, et al. Elevated risk of stroke among patients with end-stage renal disease. *Kidney Int* 2003;64:603–9. doi: 10.1046/j.1523-1755.2003.00101.x.
7. Garimella PS, Hirsch AT. Peripheral artery disease and chronic kidney disease: Clinical synergy to improve outcomes. *Adv Chronic Kidney Dis* 2014;21:460–71. doi: 10.1053/j.ackd.2014.07.005.
8. Kumada Y, Aoyama T, Ishii H, et al. Long-term outcome of percutaneous transluminal angioplasty in chronic haemodialysis patients with peripheral artery disease. *Nephrol Dial Transplant* 2007;23:3996–4001. doi: 10.1093/ndt/gfn378.

- 1  
2  
3 9. Graziani L, Silvestro A, Bertone V, et al. Percutaneous transluminal angioplasty is  
4 feasible and effective in patients on chronic dialysis with severe peripheral artery disease.  
5  
6 *Nephrol Dial Transplant* 2007;22:1144–9. doi: 10.1093/ndt/gfl764.  
7  
8
- 9  
10 10. Otsubo S, Kitamura M, Wakaume T, et al. Association of peripheral artery disease  
11 and long-term mortality in hemodialysis patients. *Int Urol Nephrol* 2012;44:569–73. doi:  
12  
13 10.1007/s11255-010-9883-8.  
14  
15
- 16  
17 11. Liew YP, Bartholomew JR, Demirjian S, et al. Combined effect of chronic kidney  
18 disease and peripheral arterial disease on all-cause mortality in a high-risk population. *Clin J*  
19  
20 *Am Soc Nephrol* 2008;3:1084–9. doi: 10.2215/CJN.04411007.  
21  
22
- 23  
24 12. O'Hare AM, Feinglass J, Sidawy AN, et al. Impact of renal insufficiency on  
25 short-term morbidity and mortality after lower extremity revascularization: data from the  
26  
27 Department of Veterans Affairs' National Surgical Quality Improvement Program. *J Am Soc*  
28  
29 *Nephrol* 2003; 14:1287–95. doi: 10.1097/01.asn.0000061776.60146.02.  
30  
31
- 32  
33 13. Liu JH, Chen JY, Lin SY, et al. Comparing survival between peritoneal dialysis and  
34 hemodialysis with subclinical peripheral artery disease: a 6-year follow up. *Int J Med Sci*  
35  
36 2013;10:434–40. doi: 10.7150/ijms.5091.  
37  
38
- 39  
40 14. Hishida M, Tamai H, Morinaga T, et al. Aichi cohort study of the prognosis in  
41 patients newly initiated into dialysis (AICOPP): baseline characteristics and trends observed  
42  
43 in diabetic nephropathy. *Clin Exp Nephrol* 2016;20:795–807. doi:  
44  
45 10.1007/s10157-015-1206-z.  
46  
47
- 48  
49 15. Lee CC, Wu CJ, Chou LH, et al. Peripheral artery disease in peritoneal dialysis and  
50 hemodialysis patients: single-center retrospective study in Taiwan. *BMC Nephrol*  
51  
52 2012;13:100. doi: 10.1186/1471-2369-13-100.  
53  
54  
55  
56  
57  
58  
59  
60

- 1  
2  
3 16. Tanaka A, Inaguma D, Shinjo H, et al. Presence of atrial fibrillation at the time of  
4 dialysis initiation is associated with mortality and cardiovascular events. *Nephron*  
5 2016;132:86–92. doi: 10.1159/000443314.  
6  
7  
8  
9  
10 17. Fontaine R, Kim M, Kieny R. Surgical treatment of peripheral circulation disorders  
11 [in German]. *Helv Chir Acta* 1954;21:499–533.  
12  
13  
14 18. Ho DE, Imai K, King G, et al. MatchIt: Nonparametric preprocessing for parametric  
15 causal inference. *J Stat Soft* 2011;42:1–28.  
16  
17  
18  
19 19. Matsuo S, Imai E, Horio M, et al. Revised equations for estimated GFR from serum  
20 creatinine in Japan. *Am J Kidney Dis* 2009;53:982–92. doi: 10.1053/j.ajkd.2008.12.034.  
21  
22  
23  
24 20. Cooper BA, Penne EL, Bartlett LH, et al. Protein malnutrition and hypoalbuminemia  
25 as predictors of vascular events and mortality in ESRD. *Am J Kidney Dis* 2004;43:61–6. doi:  
26 10.1053/j.ajkd.2003.08.045.  
27  
28  
29  
30  
31  
32  
33  
34  
35  
36  
37  
38  
39  
40  
41  
42  
43  
44  
45  
46  
47  
48  
49  
50  
51  
52  
53  
54  
55  
56  
57  
58  
59  
60

## Figure legends

**Figure 1.** Flow chart of patients with end-stage kidney disease through this observational study. Only patients who became stable and were discharged from the hospital with consent were included. Patients who were not discharged and died in the hospital were excluded.

**Figure 2.** Kaplan-Meier plot for all-cause death in patients (n = 1522) who started dialysis. PAD, peripheral artery disease.

**Figure 3.** Kaplan-Meier plot for CVD-related death in patients (n = 1522) who started dialysis. PAD, peripheral artery disease; CVD, cardiovascular disease.

**Figure 4.** Kaplan-Meier plot for infection-related death in patients (n = 1522) who started dialysis. PAD, peripheral artery disease.

**Figure 5.** Hazard ratio of PAD for all-cause death. HR, hazard ratio; PAD, peripheral artery disease. CI, confidence interval; DM, diabetes mellitus; eGFR, estimated glomerular filtration rate; BB, beta-blocker; CAD, coronary artery disease.

**Figure 6.** Kaplan-Meier plot for all-cause death in propensity score-matched patients (n = 284) with and without PAD who started dialysis. PAD, peripheral artery disease; PSM, propensity score matching.

**Figure 7.** Kaplan-Meier plot for CVD-related death in propensity score-matched patients (n = 284) with and without PAD who started dialysis. CVD, cardiovascular disease; PAD, peripheral artery disease; PSM, propensity score matching.



1  
2  
3  
4  
5 **Figure 8.** Kaplan-Meier plot for infection-related death in propensity score-matched patients  
6 (n = 284) with and without PAD who started dialysis. PAD, peripheral artery disease; PSM,  
7 propensity score matching.  
8  
9  
10  
11  
12  
13

14 **Figure 9.** Hazard ratio of PAD for all-cause death in propensity score-matched patients (n =  
15 284) who started dialysis. HR, hazard ratio.; PAD, peripheral artery disease; Pre SBP,  
16 systolic blood pressure before dialysis.  
17  
18  
19  
20  
21  
22  
23  
24  
25  
26  
27  
28  
29  
30  
31  
32  
33  
34  
35  
36  
37  
38  
39  
40  
41  
42  
43  
44  
45  
46  
47  
48  
49  
50  
51  
52  
53  
54  
55  
56  
57  
58  
59  
60

Figure 1.

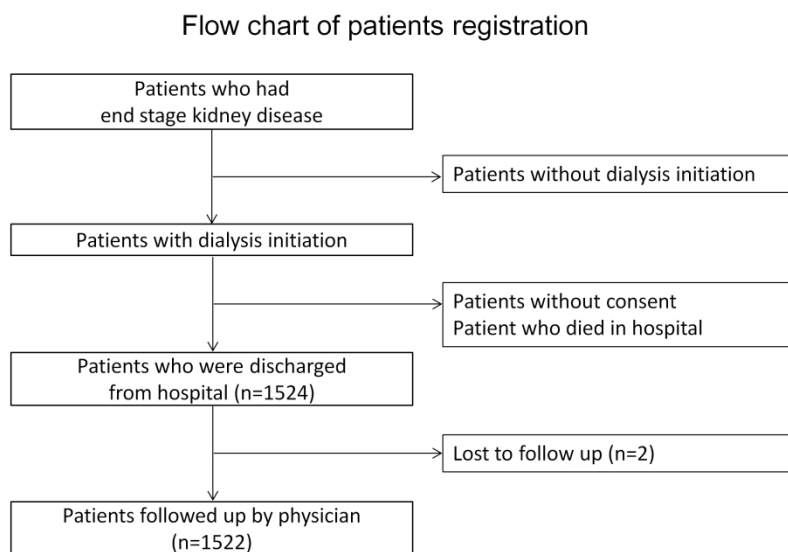

Figure 1. Flow chart of patients with end-stage kidney disease through this observational study. Only patients who became stable and were discharged from the hospital with consent were included. Patients who were not discharged and died in the hospital were excluded.

254x190mm (300 x 300 DPI)

Figure 2.

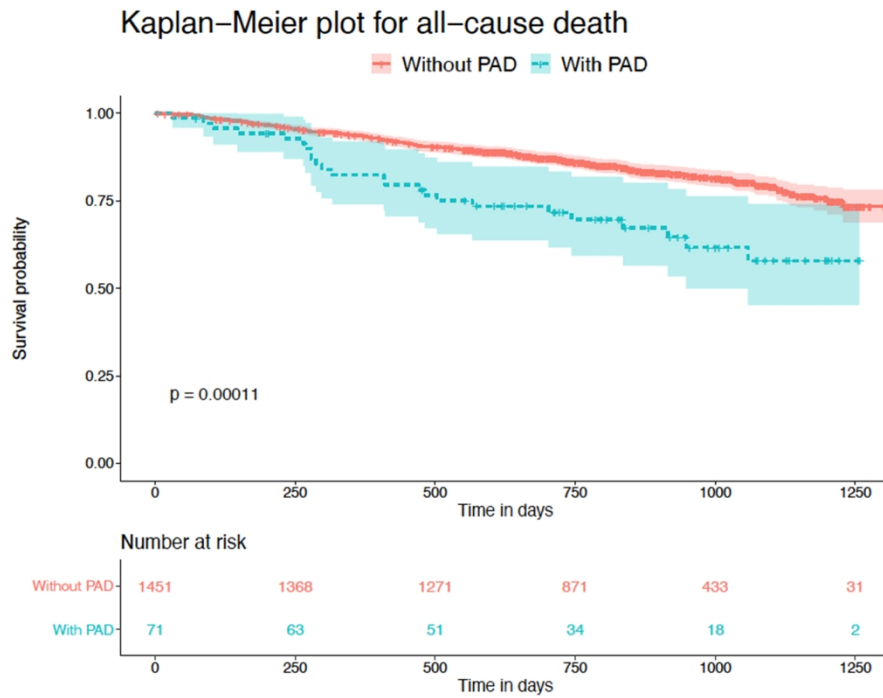

Figure 2. Kaplan-Meier plot for all-cause death in patients (n = 1522) who started dialysis. PAD, peripheral artery disease.

254x190mm (300 x 300 DPI)

Figure 3.

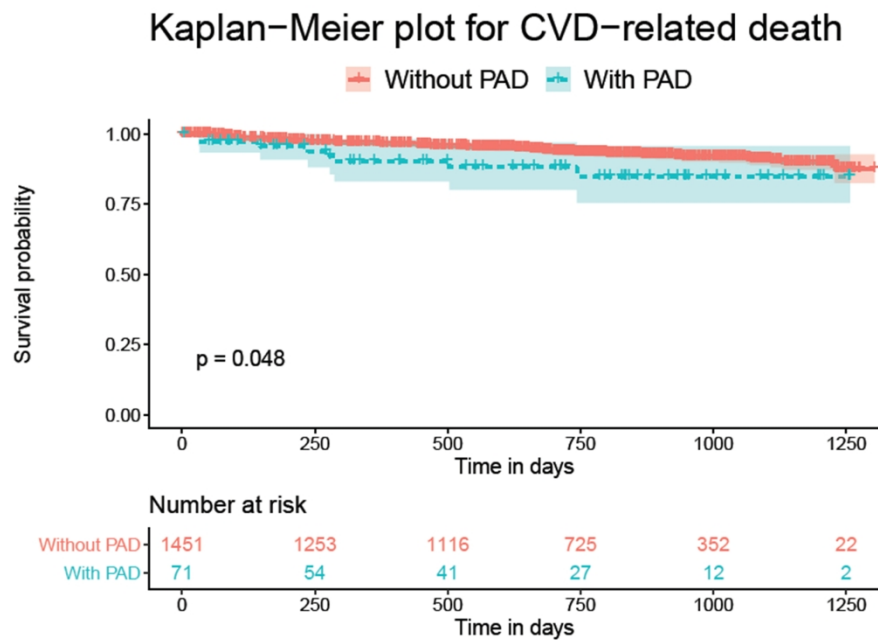

Figure 3. Kaplan-Meier plot for CVD-related death in patients (n = 1522) who started dialysis. PAD, peripheral artery disease; CVD, cardiovascular disease.

254x190mm (300 x 300 DPI)

Figure 4.

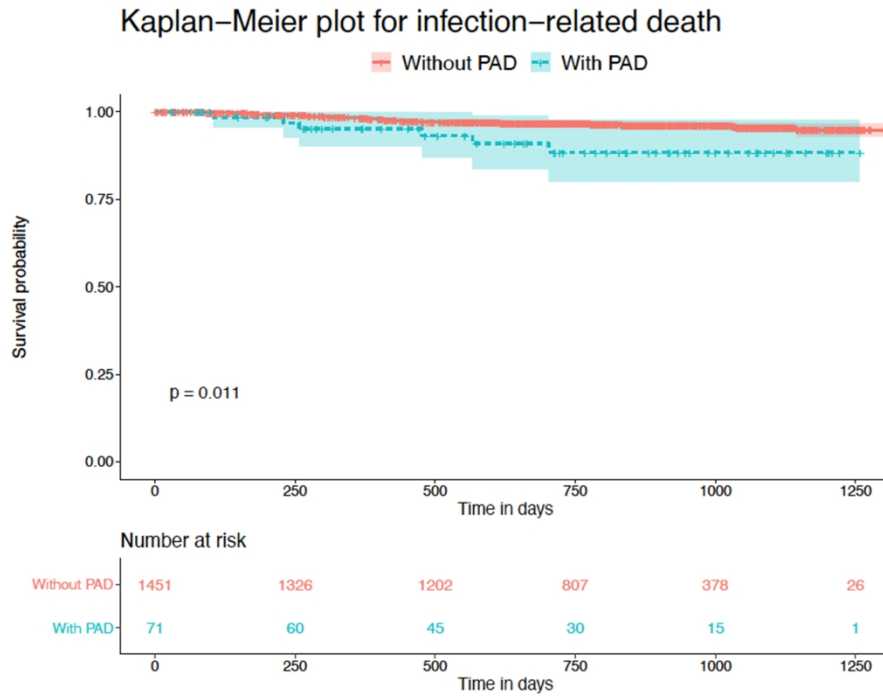

Figure 4. Kaplan-Meier plot for infection-related death in patients (n = 1522) who started dialysis. PAD, peripheral artery disease.

254x190mm (300 x 300 DPI)

Figure 5.

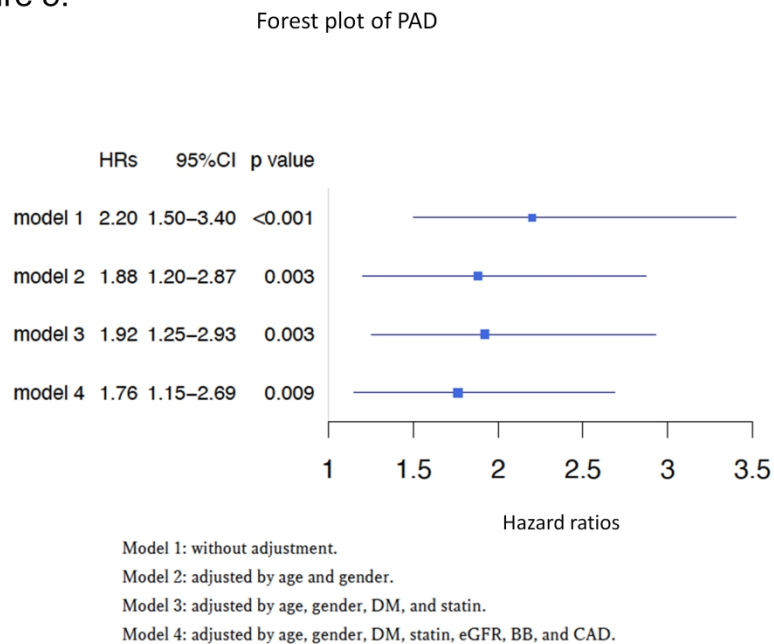

Figure 5. Hazard ratio of PAD for all-cause death. HR, hazard ratio; PAD, peripheral artery disease. CI, confidence interval; DM, diabetes mellitus; eGFR, estimated glomerular filtration rate; BB, beta-blocker; CAD, coronary artery disease.

254x190mm (300 x 300 DPI)

1  
2  
3  
4  
5  
6  
7  
8  
9  
10  
11  
12  
13  
14  
15  
16  
17  
18  
19  
20  
21  
22  
23  
24  
25  
26  
27  
28  
29  
30  
31  
32  
33  
34  
35  
36  
37  
38  
39  
40  
41  
42  
43  
44  
45  
46  
47  
48  
49  
50  
51  
52  
53  
54  
55  
56  
57  
58  
59  
60

Figure 6.

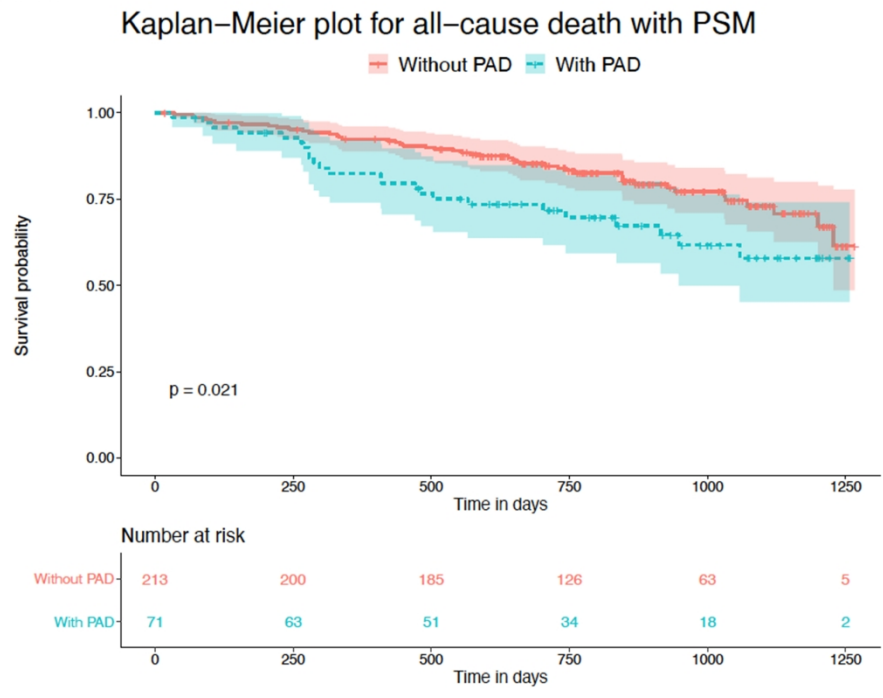

Figure 6. Kaplan-Meier plot for all-cause death in propensity score-matched patients (n = 284) with and without PAD who started dialysis. PAD, peripheral artery disease; PSM, propensity score matching.

254x190mm (300 x 300 DPI)

Figure 7.

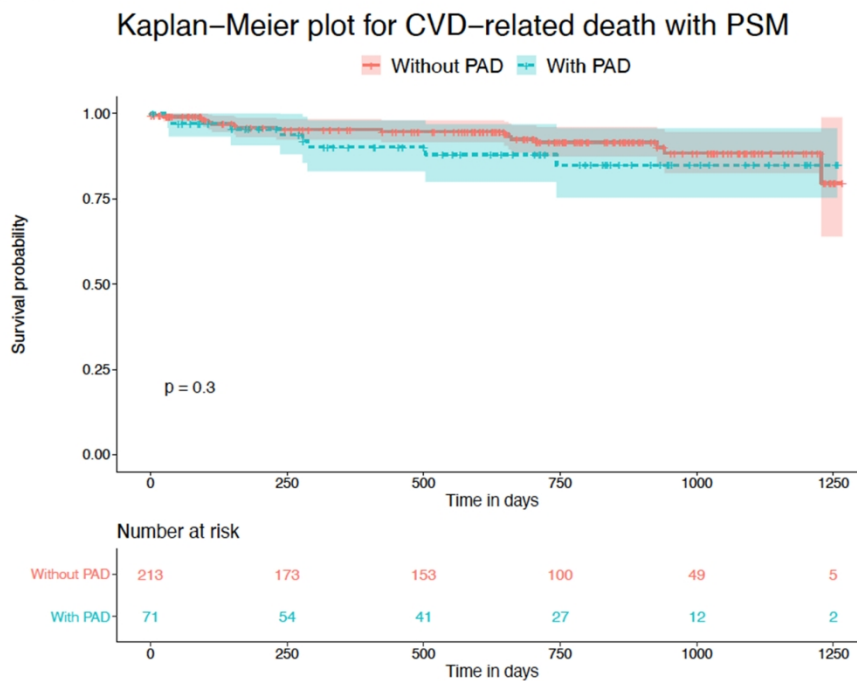

Figure 7. Kaplan-Meier plot for CVD-related death in propensity score-matched patients (n = 284) with and without PAD who started dialysis. CVD, cardiovascular disease; PAD, peripheral artery disease; PSM, propensity score matching.

254x190mm (300 x 300 DPI)



Figure 8.

## Kaplan–Meier plot for infection–related death with PSM

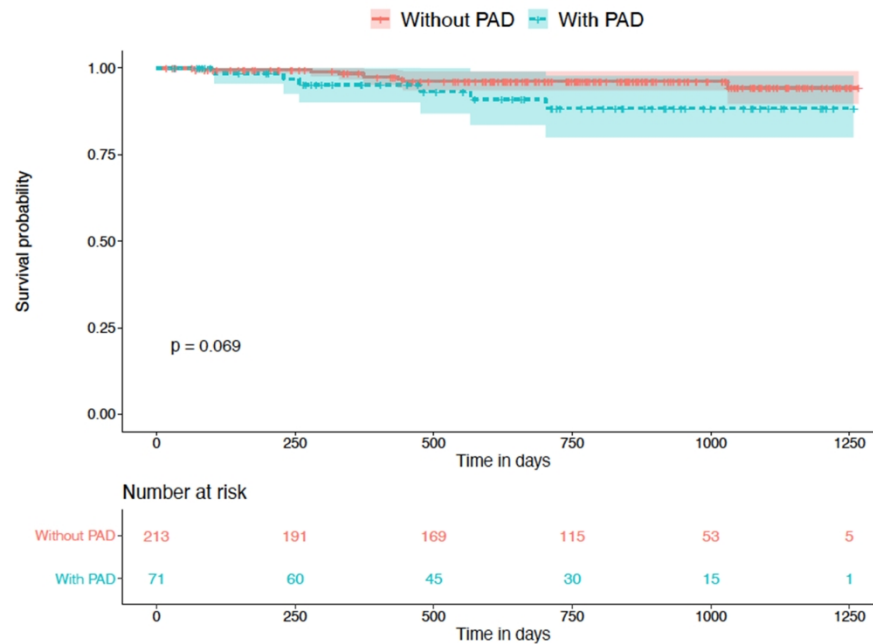

Figure 8. Kaplan–Meier plot for infection-related death in propensity score-matched patients ( $n = 284$ ) with and without PAD who started dialysis. PAD, peripheral artery disease; PSM, propensity score matching.

254x190mm (300 x 300 DPI)

Figure 9.

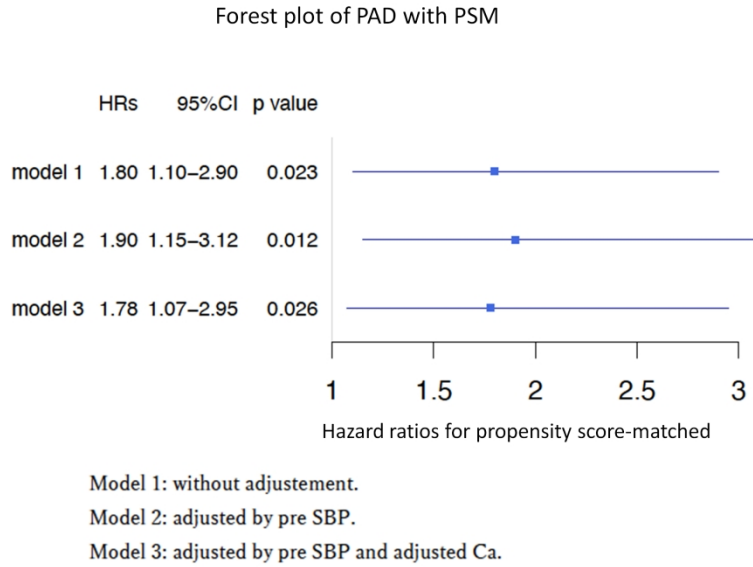

Figure 9. Hazard ratio of PAD for all-cause death in propensity score-matched patients (n = 284) who started dialysis. HR, hazard ratio.; PAD, peripheral artery disease; Pre SBP, systolic blood pressure before dialysis.

254x190mm (300 x 300 DPI)

**STROBE 2007 (v4) Statement—Checklist of items that should be included in reports of *cohort studies***

| Section/Topic                | Item # | Recommendation                                                                                                                                                                       | Reported on page # |
|------------------------------|--------|--------------------------------------------------------------------------------------------------------------------------------------------------------------------------------------|--------------------|
| <b>Title and abstract</b>    | 1      | (a) Indicate the study's design with a commonly used term in the title or the abstract                                                                                               | 1-2                |
|                              |        | (b) Provide in the abstract an informative and balanced summary of what was done and what was found                                                                                  | 2                  |
| <b>Introduction</b>          |        |                                                                                                                                                                                      |                    |
| Background/rationale         | 2      | Explain the scientific background and rationale for the investigation being reported                                                                                                 | 4-5                |
| Objectives                   | 3      | State specific objectives, including any prespecified hypotheses                                                                                                                     | 4-5                |
| <b>Methods</b>               |        |                                                                                                                                                                                      |                    |
| Study design                 | 4      | Present key elements of study design early in the paper                                                                                                                              | 5-7                |
| Setting                      | 5      | Describe the setting, locations, and relevant dates, including periods of recruitment, exposure, follow-up, and data collection                                                      | 5-6                |
| Participants                 | 6      | (a) Give the eligibility criteria, and the sources and methods of selection of participants. Describe methods of follow-up                                                           | 5-6                |
|                              |        | (b) For matched studies, give matching criteria and number of exposed and unexposed                                                                                                  | 6-7                |
| Variables                    | 7      | Clearly define all outcomes, exposures, predictors, potential confounders, and effect modifiers. Give diagnostic criteria, if applicable                                             | 6                  |
| Data sources/<br>measurement | 8*     | For each variable of interest, give sources of data and details of methods of assessment (measurement). Describe comparability of assessment methods if there is more than one group | 5-6                |
| Bias                         | 9      | Describe any efforts to address potential sources of bias                                                                                                                            | 6-7                |
| Study size                   | 10     | Explain how the study size was arrived at                                                                                                                                            | 6                  |
| Quantitative variables       | 11     | Explain how quantitative variables were handled in the analyses. If applicable, describe which groupings were chosen and why                                                         | 6-7                |
| Statistical methods          | 12     | (a) Describe all statistical methods, including those used to control for confounding                                                                                                | 6-7                |
|                              |        | (b) Describe any methods used to examine subgroups and interactions                                                                                                                  | Not applicable     |
|                              |        | (c) Explain how missing data were addressed                                                                                                                                          | 7                  |
|                              |        | (d) If applicable, explain how loss to follow-up was addressed                                                                                                                       | 7, Figure 1        |
|                              |        | (e) Describe any sensitivity analyses                                                                                                                                                | Not applicable     |
| <b>Results</b>               |        |                                                                                                                                                                                      |                    |

|                          |     |                                                                                                                                                                                                              |                |
|--------------------------|-----|--------------------------------------------------------------------------------------------------------------------------------------------------------------------------------------------------------------|----------------|
| Participants             | 13* | (a) Report numbers of individuals at each stage of study—eg numbers potentially eligible, examined for eligibility, confirmed eligible, included in the study, completing follow-up, and analysed            | 7, Figure 1    |
|                          |     | (b) Give reasons for non-participation at each stage                                                                                                                                                         | 7, Figure 1    |
|                          |     | (c) Consider use of a flow diagram                                                                                                                                                                           | Figure 1       |
| Descriptive data         | 14* | (a) Give characteristics of study participants (eg demographic, clinical, social) and information on exposures and potential confounders                                                                     | Table 1        |
|                          |     | (b) Indicate number of participants with missing data for each variable of interest                                                                                                                          |                |
|                          |     | (c) Summarise follow-up time (eg, average and total amount)                                                                                                                                                  | 8              |
| Outcome data             | 15* | Report numbers of outcome events or summary measures over time                                                                                                                                               | Table 1        |
| Main results             | 16  | (a) Give unadjusted estimates and, if applicable, confounder-adjusted estimates and their precision (eg, 95% confidence interval). Make clear which confounders were adjusted for and why they were included | Figure 5       |
|                          |     | (b) Report category boundaries when continuous variables were categorized                                                                                                                                    | Not applicable |
|                          |     | (c) If relevant, consider translating estimates of relative risk into absolute risk for a meaningful time period                                                                                             | Not applicable |
| Other analyses           | 17  | Report other analyses done—eg analyses of subgroups and interactions, and sensitivity analyses                                                                                                               | Not applicable |
| <b>Discussion</b>        |     |                                                                                                                                                                                                              |                |
| Key results              | 18  | Summarise key results with reference to study objectives                                                                                                                                                     | 9              |
| <b>Limitations</b>       |     |                                                                                                                                                                                                              |                |
| Interpretation           | 20  | Give a cautious overall interpretation of results considering objectives, limitations, multiplicity of analyses, results from similar studies, and other relevant evidence                                   | 10             |
| Generalisability         | 21  | Discuss the generalisability (external validity) of the study results                                                                                                                                        | 10             |
| <b>Other information</b> |     |                                                                                                                                                                                                              |                |
| Funding                  | 22  | Give the source of funding and the role of the funders for the present study and, if applicable, for the original study on which the present article is based                                                | 12             |

\*Give information separately for cases and controls in case-control studies and, if applicable, for exposed and unexposed groups in cohort and cross-sectional studies.

**Note:** An Explanation and Elaboration article discusses each checklist item and gives methodological background and published examples of transparent reporting. The STROBE checklist is best used in conjunction with this article (freely available on the Web sites of PLoS Medicine at <http://www.plosmedicine.org/>, Annals of Internal Medicine at <http://www.annals.org/>, and Epidemiology at <http://www.epidem.com/>). Information on the STROBE Initiative is available at [www.strobe-statement.org](http://www.strobe-statement.org).

# BMJ Open

## Peripheral artery disease at the time of dialysis initiation and mortality: a prospective observational multicenter study

|                                 |                                                                                                                                                                                                                                                                               |
|---------------------------------|-------------------------------------------------------------------------------------------------------------------------------------------------------------------------------------------------------------------------------------------------------------------------------|
| Journal:                        | <i>BMJ Open</i>                                                                                                                                                                                                                                                               |
| Manuscript ID                   | bmjopen-2020-042315.R1                                                                                                                                                                                                                                                        |
| Article Type:                   | Original research                                                                                                                                                                                                                                                             |
| Date Submitted by the Author:   | 26-Aug-2020                                                                                                                                                                                                                                                                   |
| Complete List of Authors:       | Morooka, Hikaru; Nagoya University Hospital, Nephrology<br>Tanaka, Akihito; Nagoya University Hospital, Nephrology<br>Inaguma, D.; Fujita Health University, Nephrology<br>Maruyama, Shoichi; Nagoya Daigaku Daigakuin Igakukei Kenkyuka<br>Igakubu, Department of Nephrology |
| <b>Primary Subject Heading</b>: | Renal medicine                                                                                                                                                                                                                                                                |
| Secondary Subject Heading:      | Cardiovascular medicine                                                                                                                                                                                                                                                       |
| Keywords:                       | Chronic renal failure < NEPHROLOGY, Dialysis < NEPHROLOGY, Vascular medicine < INTERNAL MEDICINE                                                                                                                                                                              |
|                                 |                                                                                                                                                                                                                                                                               |

SCHOLARONE™  
Manuscripts



I, the Submitting Author has the right to grant and does grant on behalf of all authors of the Work (as defined in the below author licence), an exclusive licence and/or a non-exclusive licence for contributions from authors who are: i) UK Crown employees; ii) where BMJ has agreed a CC-BY licence shall apply, and/or iii) in accordance with the terms applicable for US Federal Government officers or employees acting as part of their official duties; on a worldwide, perpetual, irrevocable, royalty-free basis to BMJ Publishing Group Ltd ("BMJ") its licensees and where the relevant Journal is co-owned by BMJ to the co-owners of the Journal, to publish the Work in this journal and any other BMJ products and to exploit all rights, as set out in our [licence](#).

The Submitting Author accepts and understands that any supply made under these terms is made by BMJ to the Submitting Author unless you are acting as an employee on behalf of your employer or a postgraduate student of an affiliated institution which is paying any applicable article publishing charge ("APC") for Open Access articles. Where the Submitting Author wishes to make the Work available on an Open Access basis (and intends to pay the relevant APC), the terms of reuse of such Open Access shall be governed by a Creative Commons licence – details of these licences and which [Creative Commons](#) licence will apply to this Work are set out in our licence referred to above.

Other than as permitted in any relevant BMJ Author's Self Archiving Policies, I confirm this Work has not been accepted for publication elsewhere, is not being considered for publication elsewhere and does not duplicate material already published. I confirm all authors consent to publication of this Work and authorise the granting of this licence.

1  
2  
3 **Peripheral artery disease at the time of dialysis initiation and mortality: a prospective**  
4 **observational multicenter study**  
5  
6  
7  
8  
9

10 Hikaru Morooka,<sup>1</sup> Akihito Tanaka,<sup>1</sup> Daijo Inaguma<sup>2</sup>, Shoichi Maruyama<sup>3</sup>  
11  
12  
13

14 <sup>1</sup>Division of Nephrology, Nagoya University Hospital, Nagoya, Japan  
15  
16

17 <sup>2</sup> Division of Nephrology, Fujita Health University School of Medicine, Toyoake, Japan  
18  
19

20 <sup>3</sup>Division of Nephrology, Nagoya University Graduate School of Medicine, Nagoya, Japan  
21  
22  
23

24 **Corresponding author:** Akihito Tanaka  
25

26 Division of Nephrology,  
27

28 Nagoya University Hospital  
29

30 Tsurumaicho, 65, Showa Ward, Nagoya, Aichi, Japan  
31  
32

33 Tel: +81-52-741-2111  
34

35 Fax: +81-52-744-2209  
36

37 E-mail: [tanaka17@med.nagoya-u.ac.jp](mailto:tanaka17@med.nagoya-u.ac.jp)  
38  
39  
40  
41

42 Word count: 3120.  
43  
44  
45  
46  
47  
48  
49  
50  
51  
52  
53  
54  
55  
56  
57  
58  
59  
60

## ABSTRACT

**Objectives:** Patients with peripheral artery disease (PAD) are reported to have a poorer prognosis than those without PAD. PAD is sometimes found at dialysis initiation, but its influence on the prognosis in these patients has not been investigated. We aimed to compare the mortality between patients with PAD at the time of dialysis initiation and those without PAD.

**Design:** We undertook an observational prospective multicenter study of patients starting dialysis therapy. Data were collected on patients' sex, age, presence of PAD, medication, past medical history, and clinical and laboratory data.

**Setting:** Seventeen centers participating in the Aichi Cohort Study of Prognosis in Patients Newly Initiated into Dialysis.

**Participants:** A total of 1524 patients with chronic kidney disease who started dialysis from October 2011 to September 2013. The patients were followed up until March 2015. During this time, there were two patients lost to follow-up.

**Primary and secondary outcome measures:** The primary outcome was defined as all-cause death. The secondary outcomes were defined as each cause of death.

**Results:** The study included 1030 men and 492 women with a mean age of  $67.5 \pm 13.1$  years. Of these, 71 had PAD, and 1451 did not. After a median follow-up of 814.5 days, 33.8 % of the former and 17.0 % of the latter group had died by March 2015 ( $p < 0.01$ ). After adjusting for confounding factors, PAD at dialysis initiation remained an independent risk factor for mortality ( $p < 0.01$ ).

**Conclusions:** Patients with PAD at the time of dialysis initiation had a poorer prognosis than patients without PAD. Therefore, the presence of PAD in patients starting dialysis should be considered in their monitoring and follow-up.



1  
2  
3 **Key words:** Chronic kidney diseases; Dialysis; Mortality; Peripheral artery disease  
4  
5  
6  
7  
8  
9  
10  
11  
12  
13  
14  
15  
16  
17  
18  
19  
20  
21  
22  
23  
24  
25  
26  
27  
28  
29  
30  
31  
32  
33  
34  
35  
36  
37  
38  
39  
40  
41  
42  
43  
44  
45  
46  
47  
48  
49  
50  
51  
52  
53  
54  
55  
56  
57  
58  
59  
60

For peer review only

### STRENGTHS AND LIMITATIONS OF THIS STUDY

- This observational prospective multicenter study analyzed data in patients at the beginning of dialysis and for a median follow-up of 814.5 days.
- Our study had a high follow-up rate (only two patients lost to follow-up) and a well-defined population with comprehensive data at the start of dialysis.
- The number of patients with PAD at the initiation of dialysis was comparably small, and not all of them underwent other tests such as, contrast-enhanced computed tomography, magnetic resonance angiography, and peripheral angiography to confirm the diagnosis.

## INTRODUCTION

The number of patients receiving dialysis therapy is increasing every year, and these patients have a high mortality risk from various causes, particularly cardiovascular diseases (CVD).[1, 2] End-stage kidney disease (ESKD) represents a considerable risk of atherosclerosis, and patients on dialysis tend to have further risk factors contributing to the rapid deterioration of CVD.[3] While CVD, including stroke, and coronary artery disease have been reported in more detail in patients on dialysis,[4-6] the problem of peripheral artery disease (PAD) in patients undergoing dialysis therapy has been less frequently addressed. With both aging and a growing number of diabetic patients on dialysis, the prevalence of PAD among these patients is likely to increase year by year.[7] PAD with distal lesions is more common in patients with ESKD, making the transarterial approach to the stenosis sometimes difficult.[8, 9] Furthermore, a vascular stenosis can promote peripheral ischemic skin ulcers or gangrene, leading to an intractable pathology. Thus, patients with PAD on dialysis therapy have a worse prognosis than those without PAD.[10] Consequently, there is an urgent need to clarify the relationships between PAD and mortality in patients on dialysis. Furthermore, to improve the prognosis of dialysis patients, it is crucial to understand the characteristics of those with high mortality risk.

The classic atherosclerosis risk factors, such as age, smoking, diabetes, hypertension, and hyperlipidemia, are common in patients with ESKD, but their chronic kidney disease (CKD) condition adds unique risk factors that promote PAD: chronic inflammation, hypoalbuminemia, and a pro-calcific state. PAD in ESKD patients markedly increases the possibility of myocardial ischemia and stroke, and is the main cause of limb loss and mortality, the rates of which are much higher than those in the general population.[10,11] Moreover, it has been pointed out that if patients with PAD develop critical limb ischemia, their overall survival is worse than that of patients with malignant tumors.[12] Hence, when considering the prognosis of patients receiving dialysis, the presence of PAD is important.

1  
2  
3 There are few recent reports on PAD in patients with ESKD at the time of dialysis  
4 initiation. Several studies have investigated patients receiving maintenance dialysis. In these  
5 studies, descriptive data included the prognosis of “only maintenance dialysis” patients.[10,  
6 13-15] According to them, PAD had an overall prevalence of 18.2 %, and the patient survival  
7 rate was 28.6 % during 8.8 years in the PAD group. Moreover, since these studies focused on  
8 patients on maintenance dialysis, they mainly addressed PAD that occurred during dialysis.  
9 However, renal function in patients with CKD may decrease during the treatment of PAD. At  
10 other times, PAD is found when investigating the cause of renal function deterioration or when  
11 screening patients for their eligibility for a renal transplant. PAD at the time of dialysis  
12 initiation is a complex and clinically relevant problem.  
13  
14  
15  
16  
17  
18  
19  
20  
21  
22  
23  
24  
25

26 In the present study, we compared PAD and non-PAD patients who had started  
27 dialysis therapy in the Aichi prefecture to identify the mortality associated with PAD in ESKD  
28 patients at the time of initiation of dialysis therapy.  
29  
30  
31  
32  
33  
34

## 35 **PATIENTS AND METHODS**

### 36 **Patient registration and data collection**

37  
38 Data from the Aichi Cohort Study of Prognosis in Patients Newly Initiated into Dialysis [14,  
39 16] were used in this prospective multicenter study. Patients who started dialysis between  
40 October 2011 and September 2013 at 17 Japanese institutions were eligible for participation.  
41 This study was approved by the Ethics Committee of the Institutional Review Board in Nagoya  
42 University (Approval number 1335), and all patients provided written informed consent.  
43  
44  
45  
46  
47  
48  
49

50  
51 First, we screened all patients with ESKD in whom dialysis was initiated. Only patients who  
52 became stable and were discharged or transferred from the hospital were included. Patients  
53 who were not discharged and died in the hospital were excluded (Figure 1). Data regarding  
54 patients' demographics, medical history, comorbidities, medications, and laboratory data  
55  
56  
57  
58  
59  
60

1  
2  
3 during the period of dialysis initiation were collected. PAD was clinically diagnosed based on  
4 symptoms, physical findings, and various examinations, but not all patients received  
5 angiography for diagnosis. After physicians carefully evaluated patients, we used the Fontaine  
6 classification for grading of severity. [17] The presence of PAD was defined as a Fontaine  
7 stage II or higher. Laboratory data were obtained immediately prior to the first dialysis session.  
8  
9  
10  
11  
12  
13  
14  
15 Patients were followed by survey slips sent to the dialysis facilities until the end of March  
16  
17 2015.

### 21 **Patient and public involvement**

22  
23  
24 Patients were not involved at any stage of the research for this study.  
25  
26  
27

### 28 **Mortality**

29  
30 Patients were divided into one group with PAD and one group without PAD. The primary  
31 endpoint was all-cause mortality. Causes of death were recorded to the extent possible. The  
32 occurrence of death was investigated via survey slips sent to the dialysis facilities at the end of  
33  
34  
35  
36  
37  
38 March 2015.

39  
40 We compared the outcomes, hazard ratios (HRs) and logistic regression model between the  
41  
42  
43  
44  
45  
46  
47  
48  
49  
50  
51  
52  
53  
54  
55  
56  
57  
58  
59  
60  
two groups.

### 47 **Statistics**

48  
49 Baseline characteristics were presented descriptively and compared between the two groups  
50 using the Student's *t*-test or  $\chi^2$ -test. Survival was presented graphically using the Kaplan-Meier  
51  
52  
53  
54  
55  
56  
57  
58  
59  
60  
method and analyzed using uni- and multivariate Cox regression, and uni- and multivariate  
logistic regression model. HRs were calculated and presented graphically using forest plots.  
Odds ratios (ORs) were calculated and presented on a table. We used propensity score

1  
2  
3 matching to account for differences in baseline characteristics between the two groups. The  
4  
5 propensity score was calculated based on age, sex, presence of diabetes, medication (use of  
6  
7 statins, angiotensin-converting enzyme inhibitors, angiotensin-receptor blockers, beta  
8  
9 blockers, and antiplatelets), laboratory data (levels of phosphorus, hemoglobin, and estimated  
10  
11 glomerular filtration rate), and history of coronary artery disease.  
12  
13

14 P-values of  $< 0.05$  were considered to be statistically significant. We used the R software  
15  
16 (version 4.0.0, R Foundation for Statistical Computing, Vienna, Austria, URL [http://www.R-](http://www.R-project.org/)  
17  
18 [project.org/](http://www.R-project.org/)) for all statistical analysis. For the propensity score matching, the R-package  
19  
20 MatchIt (1:3 matching with the nearest neighbor) was used.[18] Missing data were not  
21  
22 complemented, however the characteristics we used for propensity score matching were not  
23  
24 missing, however the characteristics we used for propensity score matching were not  
25  
26 missing.  
27  
28  
29

## 30 31 **RESULTS**

### 32 33 **Baseline characteristics**

34  
35 Patients' baseline characteristics are shown in Table 1. The initial population included 1524  
36  
37 participants, of whom 1032 were men, and 492 were women. The mean age was  $67.5 \pm 13.1$   
38  
39 years. Two patients were untraceable and lost to follow-up. Of the remaining 1522 patients, 71  
40  
41 (4.7%) had PAD, and 1451 did not. There were significant differences between patients with  
42  
43 and without PAD with regard to comorbidities and drug use. Antiplatelet administration was  
44  
45 significantly more frequent in those with PAD than in those without PAD. This may be because  
46  
47 treatment for PAD includes antiplatelets. However, since other causes, such as myocardial  
48  
49 infarction, can be the reason why these patients were on the antiplatelet therapy. The  
50  
51 prevalence of diabetes mellitus, coronary artery disease, and aortic dissection was significantly  
52  
53 higher in those with than in those without PAD. Patients with PAD had significantly lower  
54  
55 ejection fractions than patients without PAD. The use of both beta-blockers and statins was  
56  
57  
58  
59  
60

significantly higher in patients with PAD than in those without PAD (beta-blockers: 34.0 % and 47.9 %, respectively,  $p = 0.024$ ; statins: 39.4 % and 53.5 %, respectively,  $p = 0.024$ ). The estimated glomerular filtration rate [19] was significantly higher in patients with PAD than in those without PAD ( $6.34 \pm 1.83$  mL/min per  $1.7 \text{ m}^2$  and  $5.40 \pm 2.23$  mL/min per  $1.7 \text{ m}^2$ , respectively,  $p < 0.001$ ).

The median follow-up was 814.5 days (interquartile range 645-1037).

### Mortality

During the follow-up period, 271 patients died from various causes, including cardiovascular events (102 patients, 37.6 %), infectious disease (56 patients, 20.7 %), cancer (45 patients, 16.6 %), and other causes. The PAD group had a significantly higher mortality rate of 33.8 % than the group without PAD with 17.0 % ( $p < 0.01$ ; Table 1). Figure 2 shows the Kaplan-Meier plot for all-cause mortality in patients with and without PAD.

**Table 1.** Baseline and clinical characteristics and outcomes of patients starting dialysis (n = 1522)

|                         | Patients without PAD(n = 1451) | Patients with PAD (n= 71) | P value |
|-------------------------|--------------------------------|---------------------------|---------|
| Female (%)              | 33.1                           | 16.9                      | 0.007   |
| Age (years) (mean (SD)) | 67.4 (13.1)                    | 69.9 (12.1)               | 0.106   |
| Past history            |                                |                           |         |
| Diabetes (%)            | 50.2                           | 67.6                      | 0.006   |
| CAD (%)                 | 15.9                           | 36.6                      | <0.001  |
| PCI (%)                 | 9.6                            | 21.1                      | 0.003   |

1  
2  
3  
4  
5  
6  
7  
8  
9  
10  
11  
12  
13  
14  
15  
16  
17  
18  
19  
20  
21  
22  
23  
24  
25  
26  
27  
28  
29  
30  
31  
32  
33  
34  
35  
36  
37  
38  
39  
40  
41  
42  
43  
44  
45  
46  
47  
48  
49  
50  
51  
52  
53  
54  
55  
56  
57  
58  
59  
60

|                         |              |              |        |
|-------------------------|--------------|--------------|--------|
| CABG (%)                | 3.8          | 14.1         | <0.001 |
| Aortic dissection (%)   | 5.0          | 15.5         | <0.001 |
| Admission of HF (%)     | 19.4         | 42.3         | <0.001 |
| Stroke (%)              | 9.1          | 7.0          | 0.704  |
| Cause of CKD            |              |              | 0.294  |
| Diabetes (%)            | 42.5         | 59.2         |        |
| Nephrosclerosis (%)     | 25.3         | 25.4         |        |
| CGN (%)                 | 15.6         | 4.2          |        |
| Others, unknown (%)     | 4.3          | 4.2          |        |
| Vital data              |              |              |        |
| Pre-dialysis SBP (mmHg) | 151.1 (25.9) | 151.7 (29.5) | 0.843  |
| (mean (SD))             |              |              |        |
| Cardiac ultrasonography |              |              |        |
| EF (%) (mean (SD))      | 60.9 (12.2)  | 55.8 (13.7)  | 0.001  |
| Chest X-ray             |              |              |        |
| CTR (%) (mean (SD))     | 55.2 (7.2)   | 55.2 (7.1)   | 0.973  |
| Administration          |              |              |        |
| ARB or ACEI (%)         | 60.6         | 56.3         | 0.554  |
| BB (%)                  | 34.0         | 47.9         | 0.024  |
| Statin (%)              | 39.4         | 53.5         | 0.024  |
| VDRA (%)                | 26.9         | 29.6         | 0.726  |
| Antiplatelets (%)       | 28.9         | 56.3         | <0.001 |
| ESA (%)                 | 85.8         | 87.3         | 0.861  |



## Laboratory data

|                                   |                   |                   |        |
|-----------------------------------|-------------------|-------------------|--------|
| WBC (/uL) (mean (SD))             | 6729.88 (3130.80) | 7206.62 (3581.54) | 0.214  |
| Hb (g/dL) (mean (SD))             | 9.37 (1.55)       | 9.40 (1.45)       | 0.887  |
| Plt (10 000/uL) (mean (SD))       | 18.24 (7.62)      | 18.17 (8.19)      | 0.943  |
| Alb (g/dL) (mean (SD))            | 3.21 (0.59)       | 3.02 (0.62)       | 0.010  |
| BUN (mg/dL) (mean (SD))           | 92.02 (30.69)     | 86.68 (24.84)     | 0.149  |
| Cr (mg/dL) (mean (SD))            | 9.03 (3.24)       | 7.74 (2.22)       | 0.001  |
| eGFR (mL/min/1.73m <sup>2</sup> ) | 5.40 (2.23)       | 6.34 (1.83)       | 0.001  |
| (mean (SD))                       |                   |                   |        |
| Na (mEq/L) (mean (SD))            | 137.88 (4.41)     | 137.93 (3.91)     | 0.933  |
| K (mEq/L) (mean (SD))             | 4.56 (0.84)       | 4.43 (0.81)       | 0.194  |
| Adjusted Ca (mg/dL) (mean (SD))   | 8.59 (1.06)       | 9.06 (0.93)       | <0.001 |
| P (mg/dL) (mean (SD))             | 6.40 (1.89)       | 5.76 (1.56)       | 0.005  |
| Mg (mg/dL) (mean (SD))            | 2.15 (0.49)       | 2.17 (0.44)       | 0.826  |
| UA (mg/dL) (mean (SD))            | 8.80 (2.44)       | 8.64 (2.27)       | 0.582  |
| LDL C (mg/dL) (mean (SD))         | 89.97 (34.25)     | 87.08 (37.14)     | 0.525  |
| CRP (mg/dL) (mean (SD))           | 1.82 (4.14)       | 2.39 (4.68)       | 0.271  |
| β2MG (ng/dL) (mean (SD))          | 19.32 (5.78)      | 17.33 (5.05)      | 0.027  |
| TSAT (%) (mean (SD))              | 27.16 (16.60)     | 25.44 (17.95)     | 0.438  |
| Ferritin (ng/dL) (mean (SD))      | 222.28 (1009.80)  | 226.65 (395.74)   | 0.972  |

## Outcome

|                             |      |      |       |
|-----------------------------|------|------|-------|
| Infection-related death (%) | 3.4  | 8.5  | 0.062 |
| CVD-related death (%)       | 6.6  | 11.6 | 0.167 |
| All-cause death (%)         | 17.0 | 33.8 | 0.001 |

ACEI; angiotensin-converting enzyme inhibitor. Adjusted Ca; adjusted calcium. Alb; albumin. ARB; angiotensin receptor blocker. BB; beta blocker. BUN; blood urea nitrogen.  $\beta$  2MG; beta-2 microglobulin. Ca; calcium. CABG; coronary artery bypass grafting. CAD; coronary artery disease. CGN; chronic glomerulonephritis. CKD; chronic kidney disease. Cr; creatinine. CRP; C-reactive protein. CTR; cardiothoracic ratio. CVD; cardiovascular disease. EF; ejection fraction. eGFR; estimated glomerular filtration rate. ESA; erythropoietin stimulating agent. Hb; hemoglobin. HF; heart failure. K; potassium. LDL-C; low-density lipoprotein cholesterol. Mg; magnesium. Na; sodium. P; phosphate. PAD; peripheral arterial disease. PCI; percutaneous coronary intervention. Plt; platelet. SBP; systolic blood pressure. SD; standard deviation. TSAT; transferrin saturation. UA; uric acid. VDRA; Vitamin D receptor agonist. WBC; white blood cells.

Figure 3 shows the Kaplan-Meier plot for CVD-related mortality in patients with and without PAD. The former group had a significantly higher mortality rate than the latter group ( $p = 0.048$ ). Figure 4 shows the Kaplan-Meier plot for infection-related mortality in patients with and without PAD. The former group had a significantly higher mortality rate than the latter group ( $p = 0.011$ ). Figure 5 shows the forest plot for the HRs of PAD for all-cause death with adjustment for confounding factors. PAD was an independent risk factor for death (HR, 1.76;

95 % confidence interval, 1.15–2.69;  $p < 0.01$ ). As sensitivity analyses, we conducted the same analyses on patients, who survived longer than 3 months after the observation beginning. The results resembled the former ones (Supplemental figure 1, 3, 4), except the Kaplan-Meier plot for CVD-related mortality in patients with and without PAD ( $p = 0.094$ ; Supplemental figure 2).

### Propensity score-matched comparison between patients with and without PAD

The baseline and clinical characteristics in Table 1 showed significant differences between patients in the group with and without PAD, suggesting that there was a possibility of bias. Table 2 shows the baseline characteristics of the propensity score-matched patients with ( $n=71$ ) and without PAD ( $n=213$ ).

**Table 2.** Baseline and clinical characteristics and outcomes of propensity-score matched patients starting dialysis ( $n = 284$ )

|                         | Patients without PAD (n = 213) | Patients with PAD (n = 71) | P value |
|-------------------------|--------------------------------|----------------------------|---------|
| Female (%)              | 15.0                           | 16.9                       | 0.850   |
| Age (years) (mean (SD)) | 69.1 (12.2)                    | 69.9 (12.1)                | 0.607   |
| Past history            |                                |                            |         |
| DM (%)                  | 67.1                           | 67.6                       | 1.000   |
| CAD (%)                 | 40.4                           | 36.6                       | 0.674   |
| PCI (%)                 | 26.8                           | 21.1                       | 0.431   |
| CABG (%)                | 9.9                            | 14.1                       | 0.442   |
| Aortic dissection (%)   | 7.0                            | 15.5                       | 0.057   |
| Admission of HF (%)     | 29.1                           | 42.3                       | 0.057   |

|                             |                   |                   |       |
|-----------------------------|-------------------|-------------------|-------|
| Stroke (%)                  | 14.1              | 7.0               | 0.175 |
| Cause of CKD                |                   |                   | 0.091 |
| Diabetes (%)                | 58.7              | 59.2              |       |
| Nephrosclerosis (%)         | 25.4              | 25.4              |       |
| CGN (%)                     | 8.5               | 4.2               |       |
| Others, unknown (%)         | 2.3               | 4.2               |       |
| Vital data                  |                   |                   |       |
| Pre-dialysis SBP (mmHg)     | 151.8 (28.3)      | 151.7 (29.5)      | 0.977 |
| (mean (SD))                 |                   |                   |       |
| Cardiac ultrasonography     |                   |                   |       |
| EF (%) (mean (SD))          | 59.8 (13.8)       | 55.8 (13.7)       | 0.049 |
| Chest X-ray                 |                   |                   |       |
| CTR (%) (mean (SD))         | 55.3 (6.8)        | 55.2 (7.1)        | 0.885 |
| Administration              |                   |                   |       |
| ARB or ACEI (%)             | 59.2              | 56.3              | 0.781 |
| BB (%)                      | 49.3              | 47.9              | 0.945 |
| Statin (%)                  | 58.7              | 53.5              | 0.533 |
| VDRA (%)                    | 27.2              | 29.6              | 0.819 |
| Antiplatelets (%)           | 58.2              | 56.3              | 0.89  |
| ESA (%)                     | 89.7              | 87.3              | 0.742 |
| Laboratory data             |                   |                   |       |
| WBC (/uL) (mean (SD))       | 6704.76 (2722.41) | 7206.62 (3581.54) | 0.217 |
| Hb (g/dL) (mean (SD))       | 9.62 (1.43)       | 9.40 (1.45)       | 0.275 |
| Plt (10 000/uL) (mean (SD)) | 17.90 (7.39)      | 18.17 (8.19)      | 0.796 |
| Alb (g/dL) (mean (SD))      | 3.20 (0.60)       | 3.02 (0.62)       | 0.032 |

|                                               |                 |                 |       |
|-----------------------------------------------|-----------------|-----------------|-------|
| BUN (mg/dL) (mean (SD))                       | 87.14 (27.58)   | 86.68 (24.84)   | 0.901 |
| Cr (mg/dL) (mean (SD))                        | 8.47 (2.82)     | 7.74 (2.22)     | 0.049 |
| eGFR (mL/min/1.73m <sup>2</sup> ) (mean (SD)) | 6.05 (2.47)     | 6.34 (1.83)     | 0.368 |
| Na (mEq/L) (mean (SD))                        | 138.36 (4.56)   | 137.93 (3.91)   | 0.475 |
| K (mEq/L) (mean (SD))                         | 4.51 (0.83)     | 4.43 (0.81)     | 0.492 |
| Adjusted Ca (mg/dL) (mean (SD))               | 8.71 (0.96)     | 9.06 (0.93)     | 0.007 |
| P (mg/dL) (mean (SD))                         | 5.96 (1.63)     | 5.76 (1.56)     | 0.372 |
| Mg (mg/dL) (mean (SD))                        | 2.22 (0.46)     | 2.17 (0.44)     | 0.497 |
| UA (mg/dL) (mean (SD))                        | 8.75 (2.49)     | 8.64 (2.27)     | 0.731 |
| LDL C (mg/dL)(mean (SD))                      | 87.07 (32.01)   | 87.08 (37.14)   | 0.999 |
| CRP (mg/dL) (mean (SD))                       | 1.61 (3.30)     | 2.39 (4.68)     | 0.137 |
| β <sub>2</sub> MG (ug/dL) (mean (SD))         | 17.95 (5.04)    | 17.33 (5.05)    | 0.497 |
| TSAT (%) (mean (SD))                          | 25.41 (14.74)   | 25.44 (17.95)   | 0.992 |
| Ferritin (ng/dL) (mean (SD))                  | 171.44 (208.99) | 226.65 (395.74) | 0.153 |
| <b>Outcome</b>                                |                 |                 |       |
| Infection-related death (%)                   | 3.8             | 8.5             | 0.206 |
| CVD-related death (%)                         | 8.2             | 11.6            | 0.537 |
| All-cause death (%)                           | 21.6            | 33.8            | 0.056 |

ACEI; angiotensin-converting enzyme inhibitor. Adjusted Ca; adjusted calcium. Alb; albumin.

ARB; angiotensin receptor blocker. BB; beta blocker. BUN; blood urea nitrogen. β<sub>2</sub>MG; beta-

2 microglobulin. Ca; calcium. CABG; coronary artery bypass grafting. CAD; coronary artery

1  
2  
3 disease. CGN; chronic glomerulonephritis. CKD; chronic kidney disease. Cr; creatinine. CRP;  
4 C-reactive protein. CTR; cardiothoracic ratio. CVD; cardiovascular disease. EF; ejection  
5 fraction. eGFR; estimated glomerular filtration rate. ESA; erythropoietin stimulating agent.  
6  
7 Hb; hemoglobin. HF; heart failure. K; potassium. LDL-C; low-density lipoprotein cholesterol.  
8  
9 Mg; magnesium. Na; sodium. P; phosphate. PAD; peripheral arterial disease. PCI;  
10  
11 percutaneous coronary intervention. Plt; platelet. SBP; systolic blood pressure. SD; standard  
12  
13 deviation. TSAT; transferrin saturation. UA; uric acid. VDRA; Vitamin D receptor agonist.  
14  
15 WBC; white blood cells.  
16  
17  
18  
19  
20  
21  
22  
23  
24  
25

26 Figure 6 shows the Kaplan-Meier plot for all-cause death in matched patients with and  
27 without PAD. Patients with PAD showed a significantly worse prognosis than those without.  
28 For CVD-related and infection-related death, respectively, in matched patients with and  
29 without PAD with no significant differences between the groups ( $p = 0.3$ ,  $p = 0.069$ ). In logistic  
30 regression analysis including propensity score into multivariable factors, patients with PAD  
31 had significantly worse prognosis than patients without PAD (Table 3).  
32  
33  
34  
35  
36  
37  
38  
39  
40  
41

42 Table 3. Odds ratios of the mortality of the patients (n = 1522)  
43  
44  
45

|            | Odds Ratio | 95% CI                 | p value  |
|------------|------------|------------------------|----------|
| 47 Model 1 | 2.4891033  | 1.4940416 - 4.1468959  | 0.000462 |
| 49 Model 2 | 1.9968599  | 1.1813227 - 3.3754108  | 0.00982  |
| 51 Model 3 | 2.1169338  | 1.2413296 - 3.6101681  | 0.005891 |
| 53 Model 4 | 1.927411   | 1.12468268 - 3.3030767 | 0.016962 |

1  
2  
3 Model 1: PAD  
4

5 Model 2: PAD + propensity score  
6

7 Model 3: PAD + propensity score + pre SBP  
8

9 Model 4: PAD + propensity score + pre SBP + adjusted Calcium  
10  
11  
12

13  
14  
15 CI; confidence interval. PAD; peripheral artery disease. SBP; systolic blood pressure  
16  
17

## 18 19 **DISCUSSION**

20  
21 Our study showed that patients with PAD at the time of dialysis initiation had a significantly  
22 higher mortality than patients without PAD. This higher risk should be considered in the  
23 treatment and monitoring of these patients.  
24  
25

26  
27  
28 A previous study suggested that the prevalence of PAD in patients with ESKD reached  
29 almost 20 %.[15] In our cohort, the prevalence of PAD was much lower, most likely because  
30 our patients started dialysis, whereas the patients in the literature were on maintenance  
31 dialysis. This might reflect a deterioration of peripheral atherosclerosis with longer duration of  
32 dialysis. Another study suggested that the chronic uremic state is associated with systemic  
33 inflammation in dialysis patients, leading to hypoalbuminemia and an increased risk of  
34 PAD.[20] Hence, our results are remarkable because we showed the prevalence of PAD at the  
35 time of dialysis initiation, while past studies reported on PAD during maintenance dialysis.  
36  
37 Furthermore, patients with PAD in our study more frequently had a decreased ejection fraction  
38 and decreased albumin and increased adjusted calcium levels than those without PAD, even  
39 after propensity score matching. We cannot exclude the possibility of other factors associated  
40 with PAD that were not corrected even after our propensity score matching. This implies that  
41  
42 PAD is one symptom of a systemic atherosclerotic disease that affects not only the peripheral  
43  
44  
45  
46  
47  
48  
49  
50  
51  
52  
53  
54  
55  
56  
57  
58  
59  
60

1  
2  
3 but also coronary arteries. When seeing patients with myocardial infarction or low cardiac  
4  
5 systolic function, it is recommended to suspect that they have PAD.[7]  
6  
7

8 In this study, patients with PAD at the time of dialysis initiation had a worse prognosis  
9  
10 than patients without PAD. Patients with PAD suffered more frequently from CVD and  
11  
12 infectious diseases. After propensity score matching, all-cause mortality still indicated a similar  
13  
14 result. As our propensity score included a history of coronary artery disease, we could not show  
15  
16 a significant difference between patients with and without PAD regarding this aspect. We  
17  
18 assume that the number of patients with PAD was too small to demonstrate a significant  
19  
20 difference in infection-related deaths between patients with and without PAD. However, these  
21  
22 results support that atherosclerosis is likely to occur not only in the coronary but also in the  
23  
24 peripheral arteries in patients with ESKD. PAD is a systemic disease, which can negatively  
25  
26 affect patients' prognosis. Based on our findings, it is critical to detect patients with PAD at  
27  
28 the time of dialysis initiation.  
29  
30  
31  
32

33 Our results should be interpreted within the limitations of our study. Firstly, as this  
34  
35 was an observational study, there is an inevitable selection bias in our patients with ESKD and  
36  
37 PAD. Secondly, the number of patients with PAD was small, the number of patients who  
38  
39 received the ankle brachial index is not available. Not all patients underwent other diagnostic  
40  
41 tests such as contrast-enhanced computed tomography, magnetic resonance angiography, and  
42  
43 peripheral angiography initially. Hence, the statistical power of our results may be low.  
44  
45 Furthermore, we did not include patients with Fontaine stage I into the PAD group. However,  
46  
47 our study included a well-defined population as a strength.  
48  
49  
50  
51  
52  
53

## 54 **CONCLUSION**

55  
56  
57  
58  
59  
60



1  
2  
3 Patients with PAD at the time of dialysis initiation showed higher rates of mortality than  
4 patients without PAD. Therefore, the presence of PAD in patients starting dialysis should be  
5  
6 considered in their monitoring and follow-up.  
7  
8  
9

## 10 11 12 **Acknowledgments**

13  
14 We acknowledge the support of the following members of the Aichi Cohort Study of Prognosis  
15 in Patients Newly Initiated into Dialysis (AICOPP) for this study: Hirofumi Tamai (Anjo Kosei  
16 Hospital), Tomohiko Naruse (Kasugai Municipal Hospital), Kei Kurata (Tosei General  
17 Hospital), Hideto Oishi (Komaki City Hospital), Isao Aoyama (Japan Community Healthcare  
18 Organization Chukyo Hospital), Hiroshi Ogawa (Shinseikai Daiichi Hospital), Hiroko  
19 Kushimoto (Nishichita General Hospital), Hideaki Shimizu (Chubu-Rosai Hospital), Junichiro  
20 Yamamoto (Tsushima City Hospital), Hisashi Kurata (Toyota Kosei Hospital), Taishi  
21 Yamakawa (Toyohashi Municipal Hospital), Takaaki Yaomura (Nagoya Medical Center),  
22 Hirotake Kasuga (Nagoya Kyouritsu Hospital), Shizunori Ichida (Japanese Red Cross Nagoya  
23 Daiichi Hospital), Hibiki Shinjo (Japanese Red Cross Nagoya Daini Hospital), Shigehisa Koide  
24 (Fujita Health University Hospital), and Yukio Yuzawa (Fujita Health University Hospital).  
25  
26  
27  
28  
29  
30  
31  
32  
33  
34  
35  
36  
37  
38  
39  
40  
41

## 42 **Individual author contributions**

43  
44 DI conceived and designed the study. DI developed the bespoke dataset. AT accessed the  
45 dataset, contributed to data analysis and interpretation, and provided feedback on the article.  
46  
47 HM performed the data analysis and interpretation, wrote the first draft of the article, and  
48 subsequent revisions. SM contributed to study design, provided feedback on the article, and  
49 approved the submitted version. All authors have approved the final version for publication  
50 and agree to be accountable for all aspects of the work in ensuring that questions related to the  
51 accuracy or integrity of any part of the work are appropriately investigated and resolved.  
52  
53  
54  
55  
56  
57  
58  
59  
60

1  
2  
3 The corresponding author attests that all listed authors meet authorship criteria and that no  
4  
5 others meeting the criteria have been omitted.  
6  
7  
8  
9

### 10 **Funding**

11  
12 This research received no specific grant from any funding agency in the public, commercial,  
13  
14 or not-for-profit sectors.  
15  
16  
17  
18

### 19 **Competing interests**

20  
21 None declared.  
22  
23  
24  
25

### 26 **Data availability statement**

27  
28 No additional data are available.  
29  
30  
31  
32

### 33 **Patient and public involvement**

34  
35 No patients were involved.  
36  
37  
38  
39  
40  
41  
42  
43  
44  
45  
46  
47  
48  
49  
50  
51  
52  
53  
54  
55  
56  
57  
58  
59  
60

**REFERENCES**

1. Sato T, Sakurai H, Okubo K, et al. Current state of dialysis treatment and vascular access management in Japan. *J Vasc Access* 2019;20:10–14. doi: 10.1177/1129729819838183.
2. Masakane I, Nakai S, Ogata S, et al. An overview of regular dialysis treatment in Japan (as of 31 December 2013). *Ther Apher Dial* 2015;19:540–74. doi: 10.1111/1744-9987.12378.
3. Cozzolino M, Galassi A, Pivari F, et al. The cardiovascular burden in end-stage renal disease. *Contrib Nephrol* 2017;191:44–57. doi: 10.1159/000479250.
4. Cozzolino M, Mangano M, Stucchi A, et al. Cardiovascular disease in dialysis patients. *Nephrol Dial Transplant* 2018;33:iii28–iii34. doi: 10.1093/ndt/gfy174.
5. U.S. Renal Data System. Atlas of Chronic Kidney Disease and End-Stage Renal Disease in the United States. Bethesda, MD: National Institute of Health, National Institute of Diabetes and Digestive and Kidney Diseases 2009.
6. Seliger SL, Gillen DL, Longstreth WT Jr, et al. Elevated risk of stroke among patients with end-stage renal disease. *Kidney Int* 2003;64:603–9. doi: 10.1046/j.1523-1755.2003.00101.x.
7. Garimella PS, Hirsch AT. Peripheral artery disease and chronic kidney disease: Clinical synergy to improve outcomes. *Adv Chronic Kidney Dis* 2014;21:460–71. doi: 10.1053/j.ackd.2014.07.005.
8. Kumada Y, Aoyama T, Ishii H, et al. Long-term outcome of percutaneous transluminal angioplasty in chronic haemodialysis patients with peripheral artery disease. *Nephrol Dial Transplant* 2007;23:3996–4001. doi: 10.1093/ndt/gfn378.
9. Graziani L, Silvestro A, Bertone V, et al. Percutaneous transluminal angioplasty is feasible and effective in patients on chronic dialysis with severe peripheral artery disease. *Nephrol Dial Transplant* 2007;22:1144–9. doi: 10.1093/ndt/gfl764.

- 1  
2  
3 10. Otsubo S, Kitamura M, Wakaume T, et al. Association of peripheral artery disease  
4 and long-term mortality in hemodialysis patients. *Int Urol Nephrol* 2012;44:569–73. doi:  
5 10.1007/s11255-010-9883-8.  
6  
7  
8  
9  
10 11. Liew YP, Bartholomew JR, Demirjian S, et al. Combined effect of chronic kidney  
11 disease and peripheral arterial disease on all-cause mortality in a high-risk population. *Clin J*  
12 *Am Soc Nephrol* 2008;3:1084–9. doi: 10.2215/CJN.04411007.  
13  
14  
15  
16  
17 12. O’Hare AM, Feinglass J, Sidawy AN, et al. Impact of renal insufficiency on short-  
18 term morbidity and mortality after lower extremity revascularization: data from the Department  
19 of Veterans Affairs’ National Surgical Quality Improvement Program. *J Am Soc Nephrol* 2003;  
20 14:1287–95. doi: 10.1097/01.asn.0000061776.60146.02.  
21  
22  
23  
24  
25  
26 13. Liu JH, Chen JY, Lin SY, et al. Comparing survival between peritoneal dialysis and  
27 hemodialysis with subclinical peripheral artery disease: a 6-year follow up. *Int J Med Sci*  
28 2013;10:434–40. doi: 10.7150/ijms.5091.  
29  
30  
31  
32  
33 14. Hishida M, Tamai H, Morinaga T, et al. Aichi cohort study of the prognosis in patients  
34 newly initiated into dialysis (AICOPP): baseline characteristics and trends observed in diabetic  
35 nephropathy. *Clin Exp Nephrol* 2016;20:795–807. doi: 10.1007/s10157-015-1206-z.  
36  
37  
38  
39  
40 15. Lee CC, Wu CJ, Chou LH, et al. Peripheral artery disease in peritoneal dialysis and  
41 hemodialysis patients: single-center retrospective study in Taiwan. *BMC Nephrol* 2012;13:100.  
42 doi: 10.1186/1471-2369-13-100.  
43  
44  
45  
46  
47 16. Tanaka A, Inaguma D, Shinjo H, et al. Presence of atrial fibrillation at the time of  
48 dialysis initiation is associated with mortality and cardiovascular events. *Nephron*  
49 2016;132:86–92. doi: 10.1159/000443314.  
50  
51  
52  
53  
54 17. Fontaine R, Kim M, Kieny R. Surgical treatment of peripheral circulation disorders  
55 [in German]. *Helv Chir Acta* 1954;21:499–533.  
56  
57  
58  
59  
60

- 1  
2  
3 18. Ho DE, Imai K, King G, et al. MatchIt: Nonparametric preprocessing for parametric  
4 causal inference. *J Stat Soft* 2011;42:1–28.  
5  
6  
7 19. Matsuo S, Imai E, Horio M, et al. Revised equations for estimated GFR from serum  
8 creatinine in Japan. *Am J Kidney Dis* 2009;53:982–92. doi: 10.1053/j.ajkd.2008.12.034.  
9  
10  
11 20. Cooper BA, Penne EL, Bartlett LH, et al. Protein malnutrition and hypoalbuminemia  
12 as predictors of vascular events and mortality in ESRD. *Am J Kidney Dis* 2004;43:61–6. doi:  
13 10.1053/j.ajkd.2003.08.045.  
14  
15  
16  
17  
18  
19  
20  
21  
22  
23  
24  
25  
26  
27  
28  
29  
30  
31  
32  
33  
34  
35  
36  
37  
38  
39  
40  
41  
42  
43  
44  
45  
46  
47  
48  
49  
50  
51  
52  
53  
54  
55  
56  
57  
58  
59  
60

## Figure legends

**Figure 1.** Flow chart of patients with end-stage kidney disease through this observational study. Only patients who became stable and were discharged from the hospital with consent were included. Patients who were not discharged and died in the hospital were excluded.

**Figure 2.** Kaplan-Meier plot for all-cause death in patients (n = 1522) who started dialysis. PAD, peripheral artery disease.

**Figure 3.** Kaplan-Meier plot for CVD-related death in patients (n = 1522) who started dialysis. PAD, peripheral artery disease; CVD, cardiovascular disease.

**Figure 4.** Kaplan-Meier plot for infection-related death in patients (n = 1522) who started dialysis. PAD, peripheral artery disease.

**Figure 5.** Hazard ratio of PAD for all-cause death. HR, hazard ratio; PAD, peripheral artery disease. CI, confidence interval; DM, diabetes mellitus; eGFR, estimated glomerular filtration rate; BB, beta-blocker; CAD, coronary artery disease.

**Figure 6.** Kaplan-Meier plot for all-cause death in propensity score-matched patients (n = 284) with and without PAD who started dialysis. PAD, peripheral artery disease; PSM, propensity score matching.

## Supplement figure legends

### Supplemental figure 1:

The Kaplan-Meier plot for all-cause death for patients who survived longer than 3 months after the dialysis beginning (n = 1504). PAD, peripheral artery disease.

### Supplemental figure 2:

The Kaplan-Meier plot for CVD-related death for patients who survived longer than 3 months after the dialysis beginning (n = 1504). PAD, peripheral artery disease; CVD, cardiovascular disease.

### Supplemental figure 3:

The Kaplan-Meier plot for infection-related death for patients who survived longer than 3 months after the dialysis beginning (n = 1504). PAD, peripheral artery disease.

### Supplemental figure 4:

Hazard ratio of PAD for all-cause death in patients who survived longer than 3 months after the dialysis beginning (n = 1504). HR, hazard ratio; PAD, peripheral artery disease. CI, confidence interval; DM, diabetes mellitus; eGFR, estimated glomerular filtration rate; BB, beta-blocker; CAD, coronary artery disease.

Figure 1.

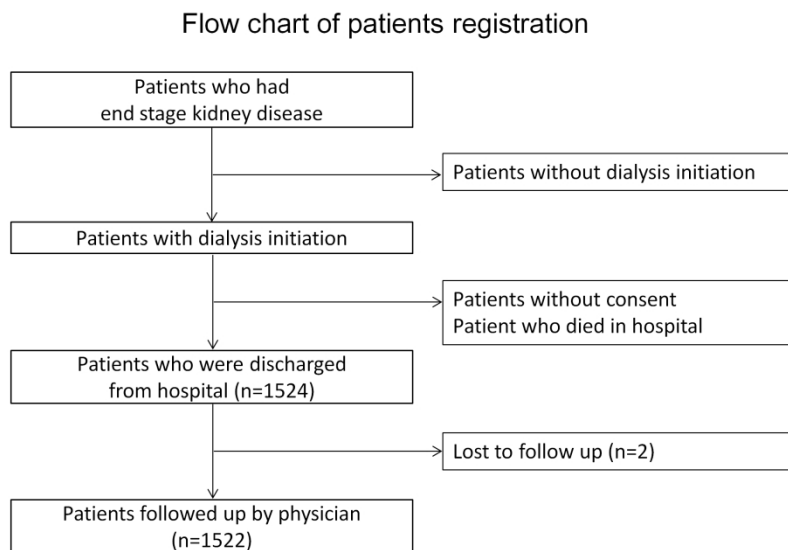

Figure 1. Flow chart of patients with end-stage kidney disease through this observational study. Only patients who became stable and were discharged from the hospital with consent were included. Patients who were not discharged and died in the hospital were excluded.

254x190mm (300 x 300 DPI)



Figure 2.

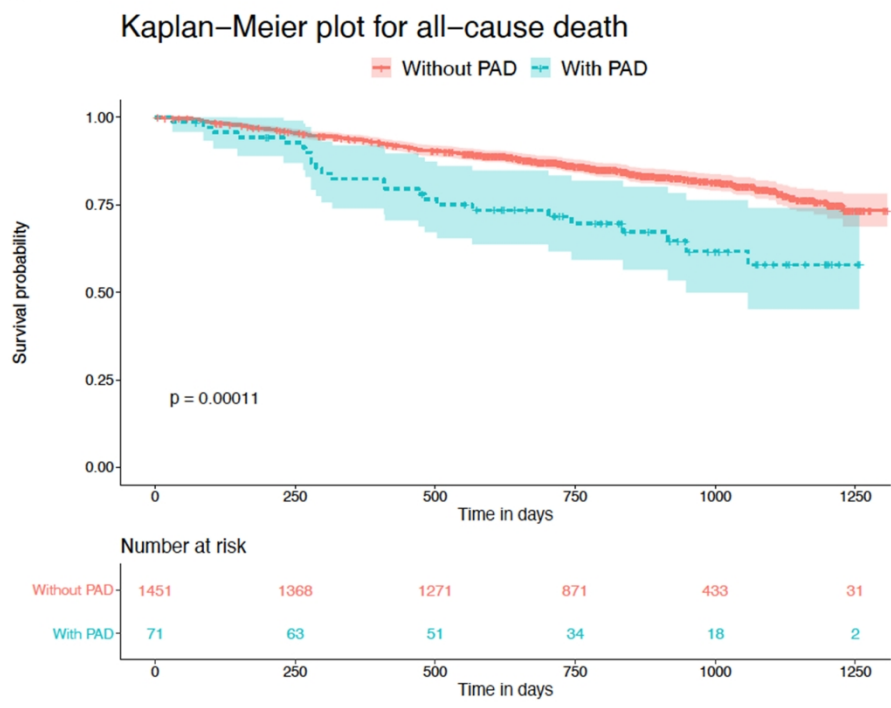

Figure 2. Kaplan-Meier plot for all-cause death in patients (n = 1522) who started dialysis. PAD, peripheral artery disease.

254x190mm (300 x 300 DPI)

Figure 3.

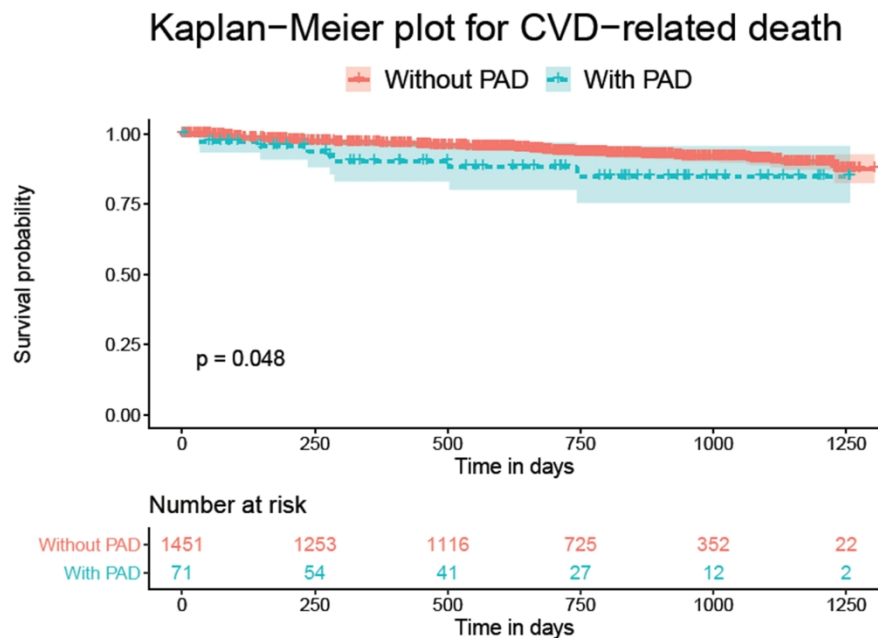

Figure 3. Kaplan-Meier plot for CVD-related death in patients (n = 1522) who started dialysis. PAD, peripheral artery disease; CVD, cardiovascular disease.

254x190mm (300 x 300 DPI)

Figure 4.

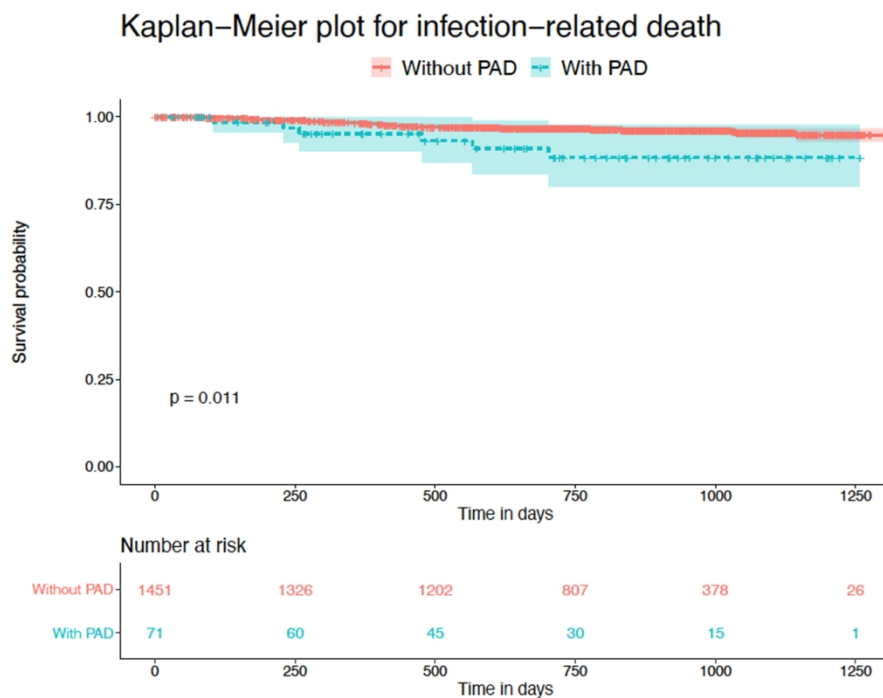

Figure 4. Kaplan-Meier plot for infection-related death in patients (n = 1522) who started dialysis. PAD, peripheral artery disease.

254x190mm (300 x 300 DPI)

Figure 5.



Figure 5. Hazard ratio of PAD for all-cause death. HR, hazard ratio; PAD, peripheral artery disease. CI, confidence interval; DM, diabetes mellitus; eGFR, estimated glomerular filtration rate; BB, beta-blocker; CAD, coronary artery disease.

254x190mm (300 x 300 DPI)

Figure 6.

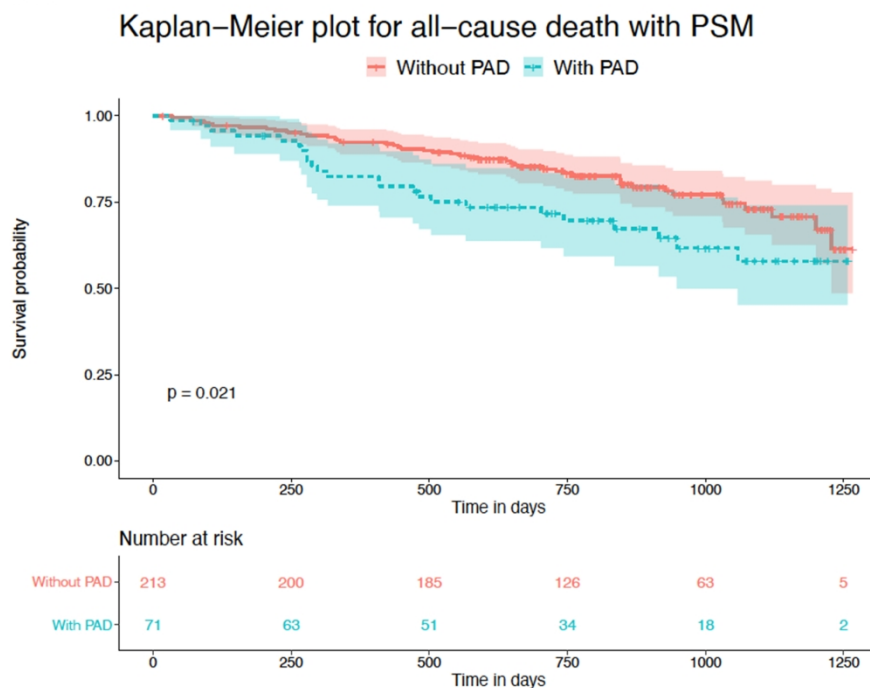

Figure 6. Kaplan-Meier plot for all-cause death in propensity score-matched patients (n = 284) with and without PAD who started dialysis. PAD, peripheral artery disease; PSM, propensity score matching.

254x190mm (300 x 300 DPI)

1  
2  
3 **Supplement material**  
4

5 **Peripheral artery disease at the time of dialysis initiation and mortality: a prospective**  
6  
7 **observational multicenter study**  
8  
9

10  
11  
12 Hikaru Morooka,<sup>1</sup> Akihito Tanaka,<sup>1</sup> Daijo Inaguma<sup>2</sup>, Shoichi Maruyama<sup>3</sup>  
13  
14

15  
16  
17 <sup>1</sup>Division of Nephrology, Nagoya University Hospital, Nagoya, Japan  
18

19 <sup>2</sup> Division of Nephrology, Fujita Health University School of Medicine, Toyoake, Japan  
20

21 <sup>3</sup>Division of Nephrology, Nagoya University Graduate School of Medicine, Nagoya, Japan  
22  
23  
24  
25  
26  
27  
28  
29  
30  
31  
32  
33  
34  
35  
36  
37  
38  
39  
40  
41  
42  
43  
44  
45  
46  
47  
48  
49  
50  
51  
52  
53  
54  
55  
56  
57  
58  
59  
60

Supplement material:

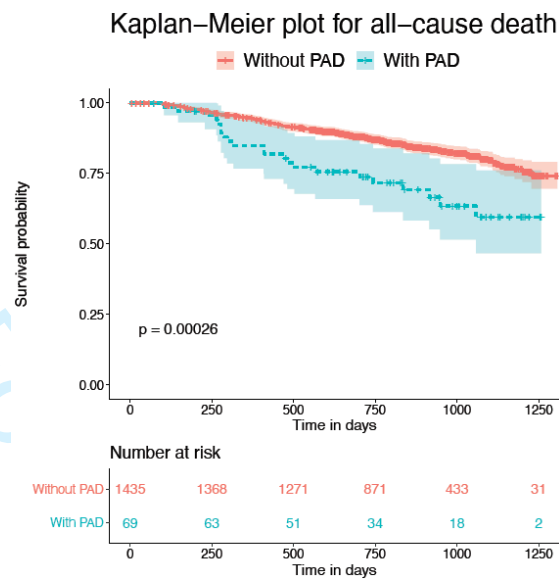

Supplemental figure 1:

The Kaplan-Meier plot for all-cause death for patients who survived longer than 3 months after the dialysis beginning (n = 1504). PAD, peripheral artery disease.

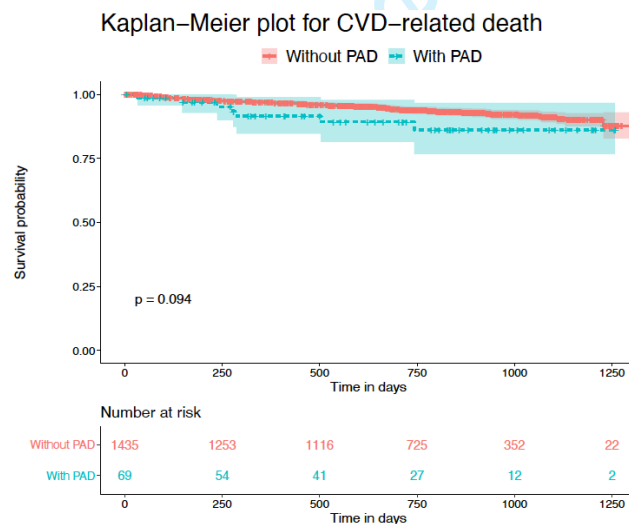

Supplemental figure 2:

The Kaplan-Meier plot for CVD-related death for patients who survived longer than 3 months after the dialysis beginning (n = 1504). PAD, peripheral artery disease; CVD, cardiovascular disease.

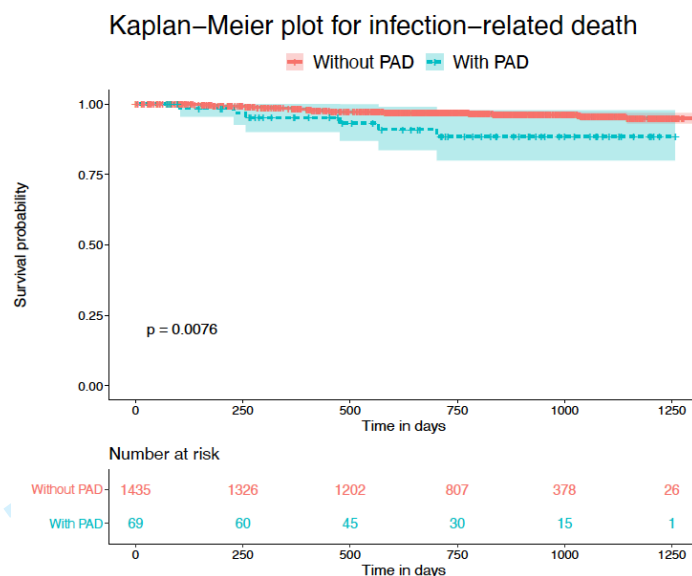

Supplemental figure 3:

The Kaplan-Meier plot for infection-related death for patients who survived longer than 3 months after the dialysis beginning (n = 1504). PAD, peripheral artery disease.

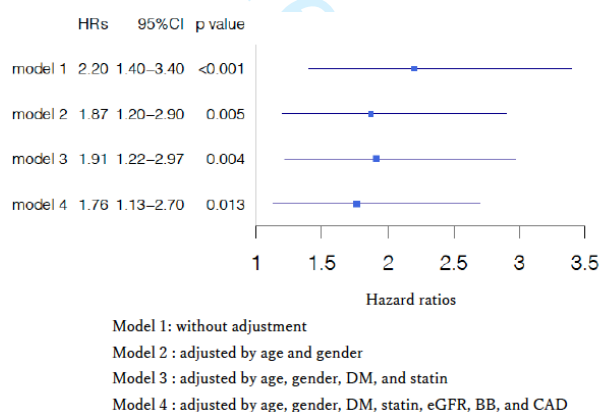

Supplemental figure 4:

Hazard ratio of PAD for all-cause death in patients who survived longer than 3 months after the dialysis beginning (n = 1504). HR, hazard ratio; PAD, peripheral artery disease. CI, confidence interval; DM, diabetes mellitus; eGFR, estimated glomerular filtration rate; BB, beta-blocker; CAD, coronary artery disease.



**STROBE 2007 (v4) Statement—Checklist of items that should be included in reports of *cohort studies***

| Section/Topic                | Item # | Recommendation                                                                                                                                                                       | Reported on page # |
|------------------------------|--------|--------------------------------------------------------------------------------------------------------------------------------------------------------------------------------------|--------------------|
| <b>Title and abstract</b>    | 1      | (a) Indicate the study's design with a commonly used term in the title or the abstract                                                                                               | 1-2                |
|                              |        | (b) Provide in the abstract an informative and balanced summary of what was done and what was found                                                                                  | 2                  |
| <b>Introduction</b>          |        |                                                                                                                                                                                      |                    |
| Background/rationale         | 2      | Explain the scientific background and rationale for the investigation being reported                                                                                                 | 4-5                |
| Objectives                   | 3      | State specific objectives, including any prespecified hypotheses                                                                                                                     | 4-5                |
| <b>Methods</b>               |        |                                                                                                                                                                                      |                    |
| Study design                 | 4      | Present key elements of study design early in the paper                                                                                                                              | 5-7                |
| Setting                      | 5      | Describe the setting, locations, and relevant dates, including periods of recruitment, exposure, follow-up, and data collection                                                      | 5-6                |
| Participants                 | 6      | (a) Give the eligibility criteria, and the sources and methods of selection of participants. Describe methods of follow-up                                                           | 5-6                |
|                              |        | (b) For matched studies, give matching criteria and number of exposed and unexposed                                                                                                  | 6-7                |
| Variables                    | 7      | Clearly define all outcomes, exposures, predictors, potential confounders, and effect modifiers. Give diagnostic criteria, if applicable                                             | 6                  |
| Data sources/<br>measurement | 8*     | For each variable of interest, give sources of data and details of methods of assessment (measurement). Describe comparability of assessment methods if there is more than one group | 5-6                |
| Bias                         | 9      | Describe any efforts to address potential sources of bias                                                                                                                            | 6-7                |
| Study size                   | 10     | Explain how the study size was arrived at                                                                                                                                            | 6                  |
| Quantitative variables       | 11     | Explain how quantitative variables were handled in the analyses. If applicable, describe which groupings were chosen and why                                                         | 6-7                |
| Statistical methods          | 12     | (a) Describe all statistical methods, including those used to control for confounding                                                                                                | 6-7                |
|                              |        | (b) Describe any methods used to examine subgroups and interactions                                                                                                                  | Not applicable     |
|                              |        | (c) Explain how missing data were addressed                                                                                                                                          | 7                  |
|                              |        | (d) If applicable, explain how loss to follow-up was addressed                                                                                                                       | 7, Figure 1        |
|                              |        | (e) Describe any sensitivity analyses                                                                                                                                                | Not applicable     |
| <b>Results</b>               |        |                                                                                                                                                                                      |                    |

|                          |     |                                                                                                                                                                                                              |                |
|--------------------------|-----|--------------------------------------------------------------------------------------------------------------------------------------------------------------------------------------------------------------|----------------|
| Participants             | 13* | (a) Report numbers of individuals at each stage of study—eg numbers potentially eligible, examined for eligibility, confirmed eligible, included in the study, completing follow-up, and analysed            | 7, Figure 1    |
|                          |     | (b) Give reasons for non-participation at each stage                                                                                                                                                         | 7, Figure 1    |
|                          |     | (c) Consider use of a flow diagram                                                                                                                                                                           | Figure 1       |
| Descriptive data         | 14* | (a) Give characteristics of study participants (eg demographic, clinical, social) and information on exposures and potential confounders                                                                     | Table 1        |
|                          |     | (b) Indicate number of participants with missing data for each variable of interest                                                                                                                          |                |
|                          |     | (c) Summarise follow-up time (eg, average and total amount)                                                                                                                                                  | 8              |
| Outcome data             | 15* | Report numbers of outcome events or summary measures over time                                                                                                                                               | Table 1        |
| Main results             | 16  | (a) Give unadjusted estimates and, if applicable, confounder-adjusted estimates and their precision (eg, 95% confidence interval). Make clear which confounders were adjusted for and why they were included | Figure 5       |
|                          |     | (b) Report category boundaries when continuous variables were categorized                                                                                                                                    | Not applicable |
|                          |     | (c) If relevant, consider translating estimates of relative risk into absolute risk for a meaningful time period                                                                                             | Not applicable |
| Other analyses           | 17  | Report other analyses done—eg analyses of subgroups and interactions, and sensitivity analyses                                                                                                               | Not applicable |
| <b>Discussion</b>        |     |                                                                                                                                                                                                              |                |
| Key results              | 18  | Summarise key results with reference to study objectives                                                                                                                                                     | 9              |
| <b>Limitations</b>       |     |                                                                                                                                                                                                              |                |
| Interpretation           | 20  | Give a cautious overall interpretation of results considering objectives, limitations, multiplicity of analyses, results from similar studies, and other relevant evidence                                   | 10             |
| Generalisability         | 21  | Discuss the generalisability (external validity) of the study results                                                                                                                                        | 10             |
| <b>Other information</b> |     |                                                                                                                                                                                                              |                |
| Funding                  | 22  | Give the source of funding and the role of the funders for the present study and, if applicable, for the original study on which the present article is based                                                | 12             |

\*Give information separately for cases and controls in case-control studies and, if applicable, for exposed and unexposed groups in cohort and cross-sectional studies.

**Note:** An Explanation and Elaboration article discusses each checklist item and gives methodological background and published examples of transparent reporting. The STROBE checklist is best used in conjunction with this article (freely available on the Web sites of PLoS Medicine at <http://www.plosmedicine.org/>, Annals of Internal Medicine at <http://www.annals.org/>, and Epidemiology at <http://www.epidem.com/>). Information on the STROBE Initiative is available at [www.strobe-statement.org](http://www.strobe-statement.org).

# BMJ Open

## Peripheral artery disease at the time of dialysis initiation and mortality: a prospective observational multicenter study

|                                 |                                                                                                                                                                                                                                                                               |
|---------------------------------|-------------------------------------------------------------------------------------------------------------------------------------------------------------------------------------------------------------------------------------------------------------------------------|
| Journal:                        | <i>BMJ Open</i>                                                                                                                                                                                                                                                               |
| Manuscript ID                   | bmjopen-2020-042315.R2                                                                                                                                                                                                                                                        |
| Article Type:                   | Original research                                                                                                                                                                                                                                                             |
| Date Submitted by the Author:   | 12-Nov-2020                                                                                                                                                                                                                                                                   |
| Complete List of Authors:       | Morooka, Hikaru; Nagoya University Hospital, Nephrology<br>Tanaka, Akihito; Nagoya University Hospital, Nephrology<br>Inaguma, D.; Fujita Health University, Nephrology<br>Maruyama, Shoichi; Nagoya Daigaku Daigakuin Igakukei Kenkyuka<br>Igakubu, Department of Nephrology |
| <b>Primary Subject Heading</b>: | Renal medicine                                                                                                                                                                                                                                                                |
| Secondary Subject Heading:      | Cardiovascular medicine                                                                                                                                                                                                                                                       |
| Keywords:                       | Chronic renal failure < NEPHROLOGY, Dialysis < NEPHROLOGY, Vascular medicine < INTERNAL MEDICINE                                                                                                                                                                              |
|                                 |                                                                                                                                                                                                                                                                               |

SCHOLARONE™  
Manuscripts



I, the Submitting Author has the right to grant and does grant on behalf of all authors of the Work (as defined in the below author licence), an exclusive licence and/or a non-exclusive licence for contributions from authors who are: i) UK Crown employees; ii) where BMJ has agreed a CC-BY licence shall apply, and/or iii) in accordance with the terms applicable for US Federal Government officers or employees acting as part of their official duties; on a worldwide, perpetual, irrevocable, royalty-free basis to BMJ Publishing Group Ltd ("BMJ") its licensees and where the relevant Journal is co-owned by BMJ to the co-owners of the Journal, to publish the Work in this journal and any other BMJ products and to exploit all rights, as set out in our [licence](#).

The Submitting Author accepts and understands that any supply made under these terms is made by BMJ to the Submitting Author unless you are acting as an employee on behalf of your employer or a postgraduate student of an affiliated institution which is paying any applicable article publishing charge ("APC") for Open Access articles. Where the Submitting Author wishes to make the Work available on an Open Access basis (and intends to pay the relevant APC), the terms of reuse of such Open Access shall be governed by a Creative Commons licence – details of these licences and which [Creative Commons](#) licence will apply to this Work are set out in our licence referred to above.

Other than as permitted in any relevant BMJ Author's Self Archiving Policies, I confirm this Work has not been accepted for publication elsewhere, is not being considered for publication elsewhere and does not duplicate material already published. I confirm all authors consent to publication of this Work and authorise the granting of this licence.

1  
2  
3 **Peripheral artery disease at the time of dialysis initiation and mortality: a prospective**  
4 **observational multicenter study**  
5  
6  
7  
8  
9

10 Hikaru Morooka,<sup>1</sup> Akihito Tanaka,<sup>1</sup> Daijo Inaguma<sup>2</sup>, Shoichi Maruyama<sup>3</sup>  
11  
12  
13

14 <sup>1</sup>Division of Nephrology, Nagoya University Hospital, Nagoya, Japan  
15  
16

17 <sup>2</sup> Division of Nephrology, Fujita Health University School of Medicine, Toyoake, Japan  
18  
19

20 <sup>3</sup>Division of Nephrology, Nagoya University Graduate School of Medicine, Nagoya, Japan  
21  
22  
23

24 **Corresponding author:** Akihito Tanaka  
25

26 Division of Nephrology,  
27

28 Nagoya University Hospital  
29

30 Tsurumaicho, 65, Showa Ward, Nagoya, Aichi, Japan  
31  
32

33 Tel: +81-52-741-2111  
34

35 Fax: +81-52-744-2209  
36

37 E-mail: [tanaka17@med.nagoya-u.ac.jp](mailto:tanaka17@med.nagoya-u.ac.jp)  
38  
39  
40  
41

42 Word count: 3251.  
43  
44  
45  
46  
47  
48  
49  
50  
51  
52  
53  
54  
55  
56  
57  
58  
59  
60

## ABSTRACT

**Objectives:** Patients with peripheral artery disease (PAD) are reported to have a poorer prognosis than those without PAD. PAD is sometimes found at dialysis initiation, but its influence on the prognosis in these patients has not been investigated. We aimed to compare the mortality between patients with PAD at the time of dialysis initiation and those without PAD.

**Design:** We undertook an observational prospective multicenter study of patients starting dialysis therapy. Data were collected on patients' sex, age, presence of PAD, medication, past medical history, and clinical and laboratory data.

**Setting:** Seventeen centers participating in the Aichi Cohort Study of Prognosis in Patients Newly Initiated into Dialysis.

**Participants:** A total of 1524 patients with chronic kidney disease who started dialysis from October 2011 to September 2013. The patients were followed up until March 2015. During this time, there were two patients lost to follow-up.

**Primary and secondary outcome measures:** The primary outcome was defined as all-cause death. The secondary outcomes were defined as each cause of death.

**Results:** The study included 1030 men and 492 women with a mean age of  $67.50 \pm 13.10$  years. Of these, 71 had PAD, and 1451 did not. After a median follow-up of 814.5 days, 33.80 % of the former and 17.00 % of the latter group had died by March 2015 ( $p = 0.001$ ). After adjusting for confounding factors, PAD at dialysis initiation remained an independent risk factor for mortality ( $p < 0.01$ ).

**Conclusions:** Patients with PAD at the time of dialysis initiation had a poorer prognosis than patients without PAD. Therefore, the presence of PAD in patients starting dialysis should be considered in their monitoring and follow-up.

1  
2  
3 **Key words:** Chronic kidney diseases; Dialysis; Mortality; Peripheral artery disease  
4  
5  
6  
7  
8  
9  
10  
11  
12  
13  
14  
15  
16  
17  
18  
19  
20  
21  
22  
23  
24  
25  
26  
27  
28  
29  
30  
31  
32  
33  
34  
35  
36  
37  
38  
39  
40  
41  
42  
43  
44  
45  
46  
47  
48  
49  
50  
51  
52  
53  
54  
55  
56  
57  
58  
59  
60

For peer review only

### STRENGTHS AND LIMITATIONS OF THIS STUDY

- This observational prospective multicenter study analyzed data in patients at the beginning of dialysis and for a median follow-up of 814.5 days.
- Our study had a high follow-up rate (only two patients lost to follow-up) and a well-defined population with comprehensive data at the start of dialysis.
- The number of patients with PAD at the initiation of dialysis was comparably small, and not all of them underwent other tests such as, contrast-enhanced computed tomography, magnetic resonance angiography, and peripheral angiography to confirm the diagnosis.



## INTRODUCTION

The number of patients receiving dialysis therapy is increasing every year, and these patients have a high mortality risk from various causes, particularly cardiovascular diseases (CVD).[1, 2] End-stage kidney disease (ESKD) represents a considerable risk of atherosclerosis, and patients on dialysis tend to have further risk factors contributing to the rapid deterioration of CVD.[3] While CVD, including stroke, and coronary artery disease have been reported in more detail in patients on dialysis,[4-6] the problem of peripheral artery disease (PAD) in patients undergoing dialysis therapy has been less frequently addressed. With both aging and a growing number of diabetic patients on dialysis, the prevalence of PAD among these patients is likely to increase year by year.[7] PAD with distal lesions is more common in patients with ESKD, making the transarterial approach to the stenosis sometimes difficult.[8, 9] Furthermore, a vascular stenosis can promote peripheral ischemic skin ulcers or gangrene, leading to an intractable pathology. Thus, patients with PAD on dialysis therapy have a worse prognosis than those without PAD.[10] Consequently, there is an urgent need to clarify the relationships between PAD and mortality in patients on dialysis. Furthermore, to improve the prognosis of dialysis patients, it is crucial to understand the characteristics of those with high mortality risk.

The classic atherosclerosis risk factors, such as age, smoking, diabetes, hypertension, and hyperlipidemia, are common in patients with ESKD, but their chronic kidney disease (CKD) condition adds unique risk factors that promote PAD: chronic inflammation, hypoalbuminemia, and a pro-calcific state. PAD in ESKD patients markedly increases the possibility of myocardial ischemia and stroke, and is the main cause of limb loss and mortality, the rates of which are much higher than those in the general population.[10,11] Moreover, it has been pointed out that if patients with PAD develop critical limb ischemia, their overall survival is worse than that of patients with malignant tumors.[12] Hence, when considering the prognosis of patients receiving dialysis, the presence of PAD is important.

1  
2  
3  
4  
5  
6  
7  
8  
9  
10  
11  
12  
13  
14  
15  
16  
17  
18  
19  
20  
21  
22  
23  
24  
25  
26  
27  
28  
29  
30  
31  
32  
33  
34  
35  
36  
37  
38  
39  
40  
41  
42  
43  
44  
45  
46  
47  
48  
49  
50  
51  
52  
53  
54  
55  
56  
57  
58  
59  
60

There are few recent reports on PAD in patients with ESKD at the time of dialysis initiation. Several studies have investigated patients receiving maintenance dialysis. In these studies, descriptive data included the prognosis of “only maintenance dialysis” patients.[10, 13-15] According to them, PAD had an overall prevalence of 18.2 %, and the patient survival rate was 28.6 % during 8.8 years in the PAD group. Moreover, since these studies focused on patients on maintenance dialysis, they mainly addressed PAD that occurred during dialysis. However, renal function in patients with CKD may decrease during the treatment of PAD. At other times, PAD is found when investigating the cause of renal function deterioration or when screening patients for their eligibility for a renal transplant. PAD at the time of dialysis initiation is a complex and clinically relevant problem.

In the present study, we compared PAD and non-PAD patients who had started dialysis therapy in the Aichi prefecture to identify the mortality associated with PAD in ESKD patients at the time of initiation of dialysis therapy.

## **PATIENTS AND METHODS**

### **Patient registration and data collection**

Data from the Aichi Cohort Study of Prognosis in Patients Newly Initiated into Dialysis [14, 16] were used in this prospective multicenter study. Patients who started dialysis between October 2011 and September 2013 at 17 Japanese institutions were eligible for participation. This study was approved by the Ethics Committee of the Institutional Review Board in Nagoya University (Approval number 1335), and all patients provided written informed consent.

First, we screened all patients with ESKD in whom dialysis was initiated. Only patients who became stable and were discharged or transferred from the hospital were included. Patients who were not discharged and died in the hospital were excluded (Figure 1). Data regarding patients' demographics, medical history, comorbidities, medications, and laboratory data

1  
2  
3 during the period of dialysis initiation were collected. PAD was clinically diagnosed based on  
4 symptoms, physical findings, and various examinations, but not all patients received  
5 angiography for diagnosis. After physicians carefully evaluated patients, we used the Fontaine  
6 classification for grading of severity. [17] The presence of PAD was defined as a Fontaine  
7 stage II or higher. Laboratory data were obtained immediately prior to the first dialysis session.  
8  
9  
10  
11  
12  
13  
14  
15  
16  
17  
18  
19  
20  
21  
22  
23  
24  
25  
26  
27  
28  
29  
30  
31  
32  
33  
34  
35  
36  
37  
38  
39  
40  
41  
42  
43  
44  
45  
46  
47  
48  
49  
50  
51  
52  
53  
54  
55  
56  
57  
58  
59  
60

Patients were followed by survey slips sent to the dialysis facilities until the end of March 2015.

### **Mortality**

Patients were divided into one group with PAD and one group without PAD. The primary endpoint was all-cause mortality. Causes of death were recorded to the extent possible. The occurrence of death was investigated via survey slips sent to the dialysis facilities at the end of March 2015.

We compared the outcomes, hazard ratios (HRs) and logistic regression model between the two groups.

### **Statistics**

Baseline characteristics were presented descriptively and compared between the two groups using the Student's *t*-test or  $\chi^2$ -test. Survival was presented graphically using the Kaplan-Meier method and analyzed using uni- and multivariate Cox regression, and uni- and multivariate logistic regression model. HRs were calculated and presented graphically using forest plots. Odds ratios (ORs) were calculated and presented on a table. We used propensity score matching to account for differences in baseline characteristics between the two groups. The propensity score was calculated based on age, sex, presence of diabetes, medication (use of statins, angiotensin-converting enzyme inhibitors, angiotensin-receptor blockers, beta

1  
2  
3 blockers, and antiplatelets), laboratory data (levels of phosphorus, hemoglobin, and estimated  
4 glomerular filtration rate), and history of coronary artery disease.  
5  
6

7 P-values of  $< 0.05$  were considered to be statistically significant. We used the R software  
8 (version 4.0.0, R Foundation for Statistical Computing, Vienna, Austria, URL [http://www.R-](http://www.R-project.org/)  
9 [project.org/](http://www.R-project.org/)) for all statistical analysis. For the propensity score matching, the R-package  
10 MatchIt (1:3 matching with the nearest neighbor) was used.[18] Missing data were not  
11  
12  
13  
14  
15  
16  
17  
18  
19  
20  
21  
22  
23  
24  
25  
26  
27  
28  
29  
30  
31  
32  
33  
34  
35  
36  
37  
38  
39  
40  
41  
42  
43  
44  
45  
46  
47  
48  
49  
50  
51  
52  
53  
54  
55  
56  
57  
58  
59  
60

### **Patient and public involvement**

Patients were not involved at any stage of the research for this study.

## **RESULTS**

### **Baseline characteristics**

Patients' baseline characteristics are shown in Table 1. The initial population included 1524 participants, of whom 1032 were men, and 492 were women. The mean age was  $67.50 \pm 13.10$  years. Two patients were untraceable and lost to follow-up. Of the remaining 1522 patients, 71 (4.70%) had PAD, and 1451 did not. There were significant differences between patients with and without PAD with regard to comorbidities and drug use. Antiplatelet administration was significantly more frequent in those with PAD than in those without PAD. This may be because treatment for PAD includes antiplatelets. However, since other causes, such as myocardial infarction, can be the reason why these patients were on the antiplatelet therapy. The prevalence of diabetes mellitus, coronary artery disease, and aortic dissection was significantly higher in those with than in those without PAD. Patients with PAD had significantly lower

1  
2  
3  
4  
5  
6  
7  
8  
9  
10  
11  
12  
13  
14  
15  
16  
17  
18  
19  
20  
21  
22  
23  
24  
25  
26  
27  
28  
29  
30  
31  
32  
33  
34  
35  
36  
37  
38  
39  
40  
41  
42  
43  
44  
45  
46  
47  
48  
49  
50  
51  
52  
53  
54  
55  
56  
57  
58  
59  
60

ejection fractions than patients without PAD. The use of both beta-blockers and statins was significantly higher in patients with PAD than in those without PAD (beta-blockers: 34.00 % and 47.90 %, respectively,  $p = 0.024$ ; statins: 39.40 % and 53.50 %, respectively,  $p = 0.024$ ). The estimated glomerular filtration rate [19] was significantly higher in patients with PAD than in those without PAD ( $6.34 \pm 1.83$  mL/min per  $1.7 \text{ m}^2$  and  $5.40 \pm 2.23$  mL/min per  $1.7 \text{ m}^2$ , respectively,  $p = 0.001$ ). The median follow-up was 814.5 days (interquartile range 645-1037).

### Mortality

During the follow-up period, 271 patients died from various causes, including cardiovascular events (102 patients, 37.6 %), infectious disease (56 patients, 20.7 %), cancer (45 patients, 16.6 %), and other causes. The PAD group had a significantly higher mortality rate of 33.80 % than the group without PAD with 17.00 % ( $p = 0.001$ ; Table 1). Figure 2 (a) shows the Kaplan-Meier plot for all-cause mortality in patients with and without PAD. Figure 2 (b) shows the Kaplan-Meier plot for CVD-related mortality in patients with and without PAD. The former group had a significantly higher mortality rate than the latter group ( $p = 0.048$ ). Figure 2 (c) shows the Kaplan-Meier plot for infection-related mortality in patients with and without PAD. The former group had a significantly higher mortality rate than the latter group ( $p = 0.011$ ). Figure 3 shows the forest plot for the HRs of PAD for all-cause death with adjustment for confounding factors. PAD was an independent risk factor for death (HR, 1.76; 95 % confidence interval, 1.15–2.69;  $p = 0.009$ ). As sensitivity analyses, we conducted the same analyses on patients, who survived longer than 3 months after the observation beginning. The results resembled the former ones (Supplemental figure 1, 2, 3), except the Kaplan-Meier plot for CVD-related mortality in patients with and without PAD ( $p = 0.094$ ; Supplemental figure 4).

### Propensity score-matched comparison between patients with and without PAD

1  
2  
3 The baseline and clinical characteristics in Table 1 showed significant differences between  
4 patients in the group with and without PAD, suggesting that there was a possibility of bias.  
5  
6  
7 Table 1 shows the baseline characteristics of the propensity score-matched patients with (n=71)  
8 and without PAD (n=213).  
9  
10  
11  
12  
13  
14  
15  
16  
17  
18  
19  
20  
21  
22  
23  
24  
25  
26  
27  
28  
29  
30  
31  
32  
33  
34  
35  
36  
37  
38  
39  
40  
41  
42  
43  
44  
45  
46  
47  
48  
49  
50  
51  
52  
53  
54  
55  
56  
57  
58  
59  
60

For peer review only

**Table 1.** Baseline and clinical characteristics and outcomes of patients starting dialysis (n = 1522) and propensity-score matched patients starting dialysis (n = 284)

|                         | Without propensity-score matched (n = 1522) |                            |         | With propensity-score matched (n = 284) |                            |         |
|-------------------------|---------------------------------------------|----------------------------|---------|-----------------------------------------|----------------------------|---------|
|                         | Patients without PAD (n = 1451)             | Patients with PAD (n = 71) | P value | Patients without PAD (n = 213)          | Patients with PAD (n = 71) | P value |
| Female (%)              | 33.10                                       | 16.90                      | 0.007   | 15.00                                   | 16.90                      | 0.850   |
| Age (years) (mean (SD)) | 67.40 (13.10)                               | 69.90 (12.10)              | 0.106   | 69.10 (12.20)                           | 69.90 (12.10)              | 0.607   |
| Past history            |                                             |                            |         |                                         |                            |         |
| Diabetes (%)            | 50.20                                       | 67.60                      | 0.006   | 67.10                                   | 67.60                      | 1.000   |
| CAD (%)                 | 15.90                                       | 36.60                      | < 0.001 | 40.40                                   | 36.60                      | 0.674   |
| PCI (%)                 | 9.60                                        | 21.10                      | 0.003   | 26.80                                   | 21.10                      | 0.431   |
| CABG (%)                | 3.80                                        | 14.10                      | < 0.001 | 9.90                                    | 14.10                      | 0.442   |
| Aortic dissection (%)   | 5.00                                        | 15.50                      | < 0.001 | 7.00                                    | 15.50                      | 0.057   |
| Admission of HF (%)     | 19.40                                       | 42.30                      | < 0.001 | 29.10                                   | 42.30                      | 0.057   |
| Stroke (%)              | 9.10                                        | 7.00                       | 0.704   | 14.10                                   | 7.00                       | 0.175   |
| Cause of CKD            |                                             |                            | 0.294   |                                         |                            | 0.091   |
| Diabetes (%)            | 42.50                                       | 59.20                      |         | 58.70                                   | 59.20                      |         |

|    |                               |                   |                      |         |                   |                            |
|----|-------------------------------|-------------------|----------------------|---------|-------------------|----------------------------|
| 1  |                               |                   |                      |         |                   |                            |
| 2  |                               |                   |                      |         |                   |                            |
| 3  |                               |                   |                      |         |                   |                            |
| 4  | Nephrosclerosis (%)           | 25.30             | 25.40                |         | 25.40             | 25.40                      |
| 5  | CGN (%)                       | 15.60             | 4.20                 |         | 8.50              | 4.20                       |
| 6  |                               |                   |                      |         |                   |                            |
| 7  | Others, unknown (%)           | 4.30              | 4.20                 |         | 2.30              | 4.20                       |
| 8  |                               |                   |                      |         |                   |                            |
| 9  | Vital data                    |                   |                      |         |                   |                            |
| 10 | Pre-dialysis SBP (mmHg) (mean |                   |                      |         |                   |                            |
| 11 | (SD))                         | 151.10 (25.90)    | 151.70 (29.50)       | 0.843   | 151.80 (28.30)    | 151.70 (29.50) 0.977       |
| 12 |                               |                   |                      |         |                   |                            |
| 13 | Cardiac ultrasonography       |                   |                      |         |                   |                            |
| 14 |                               |                   |                      |         |                   |                            |
| 15 | EF (%) (mean (SD))            | 60.90 (12.20)     | 55.80 (13.70)        | 0.001   | 59.80 (13.80)     | 55.80 (13.70) 0.049        |
| 16 |                               |                   |                      |         |                   |                            |
| 17 | Chest X-ray                   |                   |                      |         |                   |                            |
| 18 | CTR (%) (mean (SD))           | 55.20 (7.20)      | 55.20 (7.10)         | 0.973   | 55.30 (6.80)      | 55.20 (7.10) 0.885         |
| 19 |                               |                   |                      |         |                   |                            |
| 20 | Administration                |                   |                      |         |                   |                            |
| 21 |                               |                   |                      |         |                   |                            |
| 22 | ARB or ACEI (%)               | 60.60             | 56.30                | 0.554   | 59.20             | 56.30 0.781                |
| 23 | BB (%)                        | 34.00             | 47.90                | 0.024   | 49.30             | 47.90 0.945                |
| 24 |                               |                   |                      |         |                   |                            |
| 25 | Statin (%)                    | 39.40             | 53.50                | 0.024   | 58.70             | 53.50 0.533                |
| 26 |                               |                   |                      |         |                   |                            |
| 27 | VDRA (%)                      | 26.90             | 29.60                | 0.726   | 27.20             | 29.60 0.819                |
| 28 |                               |                   |                      |         |                   |                            |
| 29 | Antiplatelets (%)             | 28.90             | 56.30                | < 0.001 | 58.20             | 56.30 0.890                |
| 30 | ESA (%)                       | 85.80             | 87.30                | 0.861   | 89.70             | 87.30 0.742                |
| 31 |                               |                   |                      |         |                   |                            |
| 32 | Laboratory data               |                   |                      |         |                   |                            |
| 33 |                               |                   |                      |         |                   |                            |
| 34 | WBC (/uL) (mean (SD))         | 6729.88 (3130.80) | 7206.62<br>(3581.54) | 0.214   | 6704.76 (2722.41) | 7206.62<br>(3581.54) 0.217 |
| 35 |                               |                   |                      |         |                   |                            |
| 36 | Hb (g/dL) (mean (SD))         | 9.37 (1.55)       | 9.40 (1.45)          | 0.887   | 9.62 (1.43)       | 9.40 (1.45) 0.275          |
| 37 |                               |                   |                      |         |                   |                            |
| 38 | Plt (10 000/uL) (mean (SD))   | 18.24 (7.62)      | 18.17 (8.19)         | 0.943   | 17.90 (7.39)      | 18.17 (8.19) 0.796         |
| 39 |                               |                   |                      |         |                   |                            |
| 40 |                               |                   |                      |         |                   |                            |
| 41 |                               |                   |                      |         |                   |                            |
| 42 |                               |                   |                      |         |                   |                            |
| 43 |                               |                   |                      |         |                   |                            |
| 44 |                               |                   |                      |         |                   |                            |
| 45 |                               |                   |                      |         |                   |                            |
| 46 |                               |                   |                      |         |                   |                            |



|    |                                         |                  |                 |         |                 |                 |       |
|----|-----------------------------------------|------------------|-----------------|---------|-----------------|-----------------|-------|
| 1  |                                         |                  |                 |         |                 |                 |       |
| 2  |                                         |                  |                 |         |                 |                 |       |
| 3  |                                         |                  |                 |         |                 |                 |       |
| 4  | Alb (g/dL) (mean (SD))                  | 3.21 (0.59)      | 3.02 (0.62)     | 0.010   | 3.20 (0.60)     | 3.02 (0.62)     | 0.032 |
| 5  | BUN (mg/dL) (mean (SD))                 | 92.02 (30.69)    | 86.68 (24.84)   | 0.149   | 87.14 (27.58)   | 86.68 (24.84)   | 0.901 |
| 6  |                                         |                  |                 |         |                 |                 |       |
| 7  | Cr (mg/dL) (mean (SD))                  | 9.03 (3.24)      | 7.74 (2.22)     | 0.001   | 8.47 (2.82)     | 7.74 (2.22)     | 0.049 |
| 8  |                                         |                  |                 |         |                 |                 |       |
| 9  | eGFR (mL/min/1.73m <sup>2</sup> ) (mean | 5.40 (2.23)      | 6.34 (1.83)     | 0.001   | 6.05 (2.47)     | 6.34 (1.83)     | 0.368 |
| 10 | (SD))                                   |                  |                 |         |                 |                 |       |
| 11 | Na (mEq/L) (mean (SD))                  | 137.88 (4.41)    | 137.93 (3.91)   | 0.933   | 138.36 (4.56)   | 137.93 (3.91)   | 0.475 |
| 12 |                                         |                  |                 |         |                 |                 |       |
| 13 | K (mEq/L) (mean (SD))                   | 4.56 (0.84)      | 4.43 (0.81)     | 0.194   | 4.51 (0.83)     | 4.43 (0.81)     | 0.492 |
| 14 |                                         |                  |                 |         |                 |                 |       |
| 15 | Adjusted Ca (mg/dL) (mean (SD))         | 8.59 (1.06)      | 9.06 (0.93)     | < 0.001 | 8.71 (0.96)     | 9.06 (0.93)     | 0.007 |
| 16 |                                         |                  |                 |         |                 |                 |       |
| 17 | P (mg/dL) (mean (SD))                   | 6.40 (1.89)      | 5.76 (1.56)     | 0.005   | 5.96 (1.63)     | 5.76 (1.56)     | 0.372 |
| 18 |                                         |                  |                 |         |                 |                 |       |
| 19 | Mg (mg/dL) (mean (SD))                  | 2.15 (0.49)      | 2.17 (0.44)     | 0.826   | 2.22 (0.46)     | 2.17 (0.44)     | 0.497 |
| 20 |                                         |                  |                 |         |                 |                 |       |
| 21 | UA (mg/dL) (mean (SD))                  | 8.80 (2.44)      | 8.64 (2.27)     | 0.582   | 8.75 (2.49)     | 8.64 (2.27)     | 0.731 |
| 22 |                                         |                  |                 |         |                 |                 |       |
| 23 | LDL C (mg/dL) (mean (SD))               | 89.97 (34.25)    | 87.08 (37.14)   | 0.525   | 87.07 (32.01)   | 87.08 (37.14)   | 0.999 |
| 24 |                                         |                  |                 |         |                 |                 |       |
| 25 | CRP (mg/dL) (mean (SD))                 | 1.82 (4.14)      | 2.39 (4.68)     | 0.271   | 1.61 (3.30)     | 2.39 (4.68)     | 0.137 |
| 26 |                                         |                  |                 |         |                 |                 |       |
| 27 | β2MG (ng/dL) (mean (SD))                | 19.32 (5.78)     | 17.33 (5.05)    | 0.027   | 17.95 (5.04)    | 17.33 (5.05)    | 0.497 |
| 28 |                                         |                  |                 |         |                 |                 |       |
| 29 | TSAT (%) (mean (SD))                    | 27.16 (16.60)    | 25.44 (17.95)   | 0.438   | 25.41 (14.74)   | 25.44 (17.95)   | 0.992 |
| 30 |                                         |                  |                 |         |                 |                 |       |
| 31 | Ferritin (ng/dL) (mean (SD))            | 222.28 (1009.80) | 226.65 (395.74) | 0.972   | 171.44 (208.99) | 226.65 (395.74) | 0.153 |
| 32 |                                         |                  |                 |         |                 |                 |       |
| 33 | Outcome                                 |                  |                 |         |                 |                 |       |
| 34 | Infection-related death (%)             | 3.40             | 8.50            | 0.062   | 3.80            | 8.50            | 0.206 |
| 35 |                                         |                  |                 |         |                 |                 |       |
| 36 | CVD-related death (%)                   | 6.60             | 11.60           | 0.167   | 8.20            | 11.60           | 0.537 |
| 37 |                                         |                  |                 |         |                 |                 |       |
| 38 | All-cause death (%)                     | 17.00            | 33.80           | 0.001   | 21.60           | 33.80           | 0.056 |
| 39 |                                         |                  |                 |         |                 |                 |       |
| 40 |                                         |                  |                 |         |                 |                 |       |
| 41 |                                         |                  |                 |         |                 |                 |       |
| 42 |                                         |                  |                 |         |                 |                 |       |
| 43 |                                         |                  |                 |         |                 |                 |       |
| 44 |                                         |                  |                 |         |                 |                 |       |
| 45 |                                         |                  |                 |         |                 |                 |       |
| 46 |                                         |                  |                 |         |                 |                 |       |

1  
2  
3 ACEI; angiotensin-converting enzyme inhibitor. Adjusted Ca; adjusted calcium. Alb; albumin. ARB; angiotensin receptor blocker. BB; beta  
4 blocker. BUN; blood urea nitrogen.  $\beta$  2MG; beta-2 microglobulin. Ca; calcium. CABG; coronary artery bypass grafting. CAD; coronary artery  
5 disease. CGN; chronic glomerulonephritis. CKD; chronic kidney disease. Cr; creatinine. CRP; C-reactive protein. CTR; cardiothoracic ratio. CVD;  
6 cardiovascular disease. EF; ejection fraction. eGFR; estimated glomerular filtration rate. ESA; erythropoietin stimulating agent. Hb; hemoglobin.  
7 HF; heart failure. K; potassium. LDL-C; low-density lipoprotein cholesterol. Mg; magnesium. Na; sodium. P; phosphate. PAD; peripheral arterial  
8 disease. PCI; percutaneous coronary intervention. Plt; platelet. SBP; systolic blood pressure. SD; standard deviation. TSAT; transferrin saturation.  
9 UA; uric acid. VDRA; Vitamin D receptor agonist. WBC; white blood cells.  
10  
11  
12  
13  
14  
15  
16  
17  
18  
19  
20  
21  
22  
23  
24  
25  
26  
27  
28  
29  
30  
31  
32  
33  
34  
35  
36  
37  
38  
39  
40  
41  
42  
43  
44  
45  
46

Figure 2 (d) shows the Kaplan-Meier plot for all-cause death in matched patients with and without PAD. Patients with PAD showed a significantly worse prognosis than those without. For CVD-related and infection-related death, respectively, in matched patients with and without PAD with no significant differences between the groups ( $p = 0.300$ ,  $p = 0.069$ ). In logistic regression analysis including propensity score into multivariable factors, patients with PAD had significantly worse prognosis than patients without PAD (Table 2). Supplemental Table 1 shows results of the marginal structural Cox model. In all models, PAD was an independent risk factor even after propensity score matching (HRs  $> 2.20$ ,  $p < 0.01$ ).

Table 2. Odds ratios of the mortality of the patients (n = 1522)

|         | Odds Ratio | 95% CI      | p value   |
|---------|------------|-------------|-----------|
| Model 1 | 2.49       | 1.49 - 4.15 | $< 0.001$ |
| Model 2 | 2.00       | 1.18 - 3.38 | 0.010     |
| Model 3 | 2.12       | 1.24 - 3.61 | 0.006     |
| Model 4 | 1.93       | 1.12 - 3.30 | 0.017     |

Model 1: PAD

Model 2: PAD + propensity score

Model 3: PAD + propensity score + pre SBP

Model 4: PAD + propensity score + pre SBP + adjusted Calcium

CI; confidence interval. PAD; peripheral artery disease. SBP; systolic blood pressure

## DISCUSSION

Our study showed that patients with PAD at the time of dialysis initiation had a significantly higher mortality than patients without PAD. This higher risk should be considered in the treatment and monitoring of these patients.

A previous study suggested that the prevalence of PAD in patients with ESKD reached almost 20 %. [15] In our cohort, the prevalence of PAD was much lower, most likely because our patients started dialysis, whereas the patients in the literature were on maintenance dialysis. This might reflect a deterioration of peripheral atherosclerosis with longer duration of dialysis. Another study suggested that the chronic uremic state is associated with systemic inflammation in dialysis patients, leading to hypoalbuminemia and an increased risk of PAD. [20] Hence, our results are remarkable because we showed the prevalence of PAD at the time of dialysis initiation, while past studies reported on PAD during maintenance dialysis. Furthermore, patients with PAD in our study more frequently had a decreased ejection fraction and decreased albumin and increased adjusted calcium levels than those without PAD, even after propensity score matching. We cannot exclude the possibility of other factors associated with PAD that were not corrected even after our propensity score matching. This implies that PAD is one symptom of a systemic atherosclerotic disease that affects not only the peripheral but also coronary arteries. When seeing patients with myocardial infarction or low cardiac systolic function, it is recommended to suspect that they have PAD. [7]

In this study, patients with PAD at the time of dialysis initiation had a worse prognosis than patients without PAD. Patients with PAD suffered more frequently from CVD and infectious diseases. After propensity score matching, all-cause mortality still indicated a similar result. As our propensity score included a history of coronary artery disease, we could not show a significant difference between patients with and without PAD regarding this aspect. We assume that the number of patients with PAD was too small to demonstrate a significant

1  
2  
3 difference in infection-related deaths between patients with and without PAD. However, these  
4  
5 results support that atherosclerosis is likely to occur not only in the coronary but also in the  
6  
7 peripheral arteries in patients with ESKD. PAD is a systemic disease, which can negatively  
8  
9 affect patients' prognosis. Based on our findings, it is critical to detect patients with PAD at  
10  
11 the time of dialysis initiation.  
12  
13

14  
15 Our results should be interpreted within the limitations of our study. Firstly, as this  
16  
17 was an observational study, there is an inevitable selection bias in our patients with ESKD and  
18  
19 PAD. Secondly, the number of patients with PAD was small, and the number of patients who  
20  
21 received ankle brachial index (ABI) is not available. Because we did not examine ABI for all  
22  
23 patients, we were not able to diagnose asymptomatic patients or those who did not describe  
24  
25 their symptoms seen in PAD. ABI is a frequently used examination for PAD diagnosis and the  
26  
27 lack of this result is important. Furthermore, how many patients underwent other diagnostic  
28  
29 tests, such as contrast-enhanced computed tomography, magnetic resonance angiography, and  
30  
31 peripheral angiography, and the results of these tests were unavailable. Hence, the statistical  
32  
33 power of our results may be low. Furthermore, we did not include patients with Fontaine stage  
34  
35 I into the PAD group. However, our study included a well-defined population as a strength.  
36  
37  
38  
39  
40  
41

## 42 **CONCLUSION**

43  
44 Patients with PAD at the time of dialysis initiation showed higher rates of mortality than  
45  
46 patients without PAD. Therefore, the presence of PAD in patients starting dialysis should be  
47  
48 considered in their monitoring and follow-up.  
49  
50  
51

## 52 **Acknowledgments**

53  
54 We acknowledge the support of the following members of the Aichi Cohort Study of Prognosis  
55  
56 in Patients Newly Initiated into Dialysis (AICOPP) for this study: Hirofumi Tamai (Anjo Kosei  
57  
58  
59  
60

1  
2  
3 Hospital), Tomohiko Naruse (Kasugai Municipal Hospital), Kei Kurata (Tosei General  
4 Hospital), Hideto Oishi (Komaki City Hospital), Isao Aoyama (Japan Community Healthcare  
5 Organization Chukyo Hospital), Hiroshi Ogawa (Shinseikai Daiichi Hospital), Hiroko  
6  
7  
8 Kushimoto (Nishichita General Hospital), Hideaki Shimizu (Chubu-Rosai Hospital), Junichiro  
9  
10  
11  
12 Yamamoto (Tsushima City Hospital), Hisashi Kurata (Toyota Kosei Hospital), Taishi  
13  
14  
15 Yamakawa (Toyohashi Municipal Hospital), Takaaki Yaomura (Nagoya Medical Center),  
16  
17 Hirotake Kasuga (Nagoya Kyouritsu Hospital), Shizunori Ichida (Japanese Red Cross Nagoya  
18  
19 Daiichi Hospital), Hibiki Shinjo (Japanese Red Cross Nagoya Daini Hospital), Shigehisa Koide  
20  
21 (Fujita Health University Hospital), and Yukio Yuzawa (Fujita Health University Hospital).  
22  
23  
24  
25

### 26 **Individual author contributions**

27  
28 DI conceived and designed the study. DI developed the bespoke dataset. AT accessed the  
29  
30 dataset, contributed to data analysis and interpretation, and provided feedback on the article.  
31  
32  
33 HM performed the data analysis and interpretation, wrote the first draft of the article, and  
34  
35 subsequent revisions. SM contributed to study design, provided feedback on the article, and  
36  
37 approved the submitted version. All authors have approved the final version for publication  
38  
39 and agree to be accountable for all aspects of the work in ensuring that questions related to the  
40  
41 accuracy or integrity of any part of the work are appropriately investigated and resolved.  
42  
43

44  
45 The corresponding author attests that all listed authors meet authorship criteria and that no  
46  
47 others meeting the criteria have been omitted.  
48  
49  
50

### 51 **Funding**

52  
53 This research received no specific grant from any funding agency in the public, commercial,  
54  
55 or not-for-profit sectors.  
56  
57  
58  
59  
60

1  
2  
3 **Competing interests**  
4

5 None declared.  
6  
7  
8  
9

10 **Data availability statement**  
11

12 No additional data are available.  
13  
14  
15  
16

17 **Patient and public involvement**  
18

19 No patients were involved.  
20  
21  
22  
23  
24  
25  
26  
27  
28  
29  
30  
31  
32  
33  
34  
35  
36  
37  
38  
39  
40  
41  
42  
43  
44  
45  
46  
47  
48  
49  
50  
51  
52  
53  
54  
55  
56  
57  
58  
59  
60

## REFERENCES

1. Sato T, Sakurai H, Okubo K, et al. Current state of dialysis treatment and vascular access management in Japan. *J Vasc Access* 2019;20:10–14. doi: 10.1177/1129729819838183.
2. Masakane I, Nakai S, Ogata S, et al. An overview of regular dialysis treatment in Japan (as of 31 December 2013). *Ther Apher Dial* 2015;19:540–74. doi: 10.1111/1744-9987.12378.
3. Cozzolino M, Galassi A, Pivari F, et al. The cardiovascular burden in end-stage renal disease. *Contrib Nephrol* 2017;191:44–57. doi: 10.1159/000479250.
4. Cozzolino M, Mangano M, Stucchi A, et al. Cardiovascular disease in dialysis patients. *Nephrol Dial Transplant* 2018;33:iii28–iii34. doi: 10.1093/ndt/gfy174.
5. U.S. Renal Data System. Atlas of Chronic Kidney Disease and End-Stage Renal Disease in the United States. Bethesda, MD: National Institute of Health, National Institute of Diabetes and Digestive and Kidney Diseases 2009.
6. Seliger SL, Gillen DL, Longstreth WT Jr, et al. Elevated risk of stroke among patients with end-stage renal disease. *Kidney Int* 2003;64:603–9. doi: 10.1046/j.1523-1755.2003.00101.x.
7. Garimella PS, Hirsch AT. Peripheral artery disease and chronic kidney disease: Clinical synergy to improve outcomes. *Adv Chronic Kidney Dis* 2014;21:460–71. doi: 10.1053/j.ackd.2014.07.005.
8. Kumada Y, Aoyama T, Ishii H, et al. Long-term outcome of percutaneous transluminal angioplasty in chronic haemodialysis patients with peripheral artery disease. *Nephrol Dial Transplant* 2007;23:3996–4001. doi: 10.1093/ndt/gfn378.
9. Graziani L, Silvestro A, Bertone V, et al. Percutaneous transluminal angioplasty is feasible and effective in patients on chronic dialysis with severe peripheral artery disease. *Nephrol Dial Transplant* 2007;22:1144–9. doi: 10.1093/ndt/gfl764.



- 1  
2  
3 10. Otsubo S, Kitamura M, Wakaume T, et al. Association of peripheral artery disease  
4 and long-term mortality in hemodialysis patients. *Int Urol Nephrol* 2012;44:569–73. doi:  
5 10.1007/s11255-010-9883-8.  
6  
7  
8  
9  
10 11. Liew YP, Bartholomew JR, Demirjian S, et al. Combined effect of chronic kidney  
11 disease and peripheral arterial disease on all-cause mortality in a high-risk population. *Clin J*  
12 *Am Soc Nephrol* 2008;3:1084–9. doi: 10.2215/CJN.04411007.  
13  
14  
15  
16  
17 12. O’Hare AM, Feinglass J, Sidawy AN, et al. Impact of renal insufficiency on short-  
18 term morbidity and mortality after lower extremity revascularization: data from the Department  
19 of Veterans Affairs’ National Surgical Quality Improvement Program. *J Am Soc Nephrol* 2003;  
20 14:1287–95. doi: 10.1097/01.asn.0000061776.60146.02.  
21  
22  
23  
24  
25  
26 13. Liu JH, Chen JY, Lin SY, et al. Comparing survival between peritoneal dialysis and  
27 hemodialysis with subclinical peripheral artery disease: a 6-year follow up. *Int J Med Sci*  
28 2013;10:434–40. doi: 10.7150/ijms.5091.  
29  
30  
31  
32  
33 14. Hishida M, Tamai H, Morinaga T, et al. Aichi cohort study of the prognosis in patients  
34 newly initiated into dialysis (AICOPP): baseline characteristics and trends observed in diabetic  
35 nephropathy. *Clin Exp Nephrol* 2016;20:795–807. doi: 10.1007/s10157-015-1206-z.  
36  
37  
38  
39  
40 15. Lee CC, Wu CJ, Chou LH, et al. Peripheral artery disease in peritoneal dialysis and  
41 hemodialysis patients: single-center retrospective study in Taiwan. *BMC Nephrol* 2012;13:100.  
42 doi: 10.1186/1471-2369-13-100.  
43  
44  
45  
46  
47 16. Tanaka A, Inaguma D, Shinjo H, et al. Presence of atrial fibrillation at the time of  
48 dialysis initiation is associated with mortality and cardiovascular events. *Nephron*  
49 2016;132:86–92. doi: 10.1159/000443314.  
50  
51  
52  
53  
54 17. Fontaine R, Kim M, Kieny R. Surgical treatment of peripheral circulation disorders  
55 [in German]. *Helv Chir Acta* 1954;21:499–533.  
56  
57  
58  
59  
60

- 1  
2  
3 18. Ho DE, Imai K, King G, et al. MatchIt: Nonparametric preprocessing for parametric  
4 causal inference. *J Stat Soft* 2011;42:1–28.  
5  
6  
7 19. Matsuo S, Imai E, Horio M, et al. Revised equations for estimated GFR from serum  
8 creatinine in Japan. *Am J Kidney Dis* 2009;53:982–92. doi: 10.1053/j.ajkd.2008.12.034.  
9  
10  
11 20. Cooper BA, Penne EL, Bartlett LH, et al. Protein malnutrition and hypoalbuminemia  
12 as predictors of vascular events and mortality in ESRD. *Am J Kidney Dis* 2004;43:61–6. doi:  
13 10.1053/j.ajkd.2003.08.045.  
14  
15  
16  
17  
18  
19  
20  
21  
22  
23  
24  
25  
26  
27  
28  
29  
30  
31  
32  
33  
34  
35  
36  
37  
38  
39  
40  
41  
42  
43  
44  
45  
46  
47  
48  
49  
50  
51  
52  
53  
54  
55  
56  
57  
58  
59  
60

## Figure legends

**Figure 1.** Flow chart of patients with end-stage kidney disease through this observational study. Only patients who became stable and were discharged from the hospital with consent were included. Patients who were not discharged and died in the hospital were excluded.

**Figure 2.** Kaplan-Meier plots. (a) all-cause death in patients (n = 1522) who started dialysis. (b) CVD-related death in patients (n = 1522) who started dialysis. (c) infection-related death in patients (n = 1522) who started dialysis. (d) all-cause death in propensity score-matched patients (n = 284) with and without PAD who started dialysis. CVD, cardiovascular disease; PAD, peripheral artery disease; PSM, propensity score matching.

**Figure 3.** Hazard ratio of PAD for all-cause death. HR, hazard ratio; PAD, peripheral artery disease. CI, confidence interval; DM, diabetes mellitus; eGFR, estimated glomerular filtration rate; BB, beta-blocker; CAD, coronary artery disease.

## Supplement figure legends

### Supplemental figure 1:

The Kaplan-Meier plot for all-cause death for patients who survived longer than 3 months after the dialysis beginning (n = 1504). PAD, peripheral artery disease.

### Supplemental figure 2:

The Kaplan-Meier plot for infection-related death for patients who survived longer than 3 months after the dialysis beginning (n = 1504). PAD, peripheral artery disease.

### Supplemental figure 3:

Hazard ratio of PAD for all-cause death in patients who survived longer than 3 months after the dialysis beginning (n = 1504). HR, hazard ratio; PAD, peripheral artery disease. CI, confidence interval; DM, diabetes mellitus; eGFR, estimated glomerular filtration rate; BB, beta-blocker; CAD, coronary artery disease.

### Supplemental figure 4:

The Kaplan-Meier plot for CVD-related death for patients who survived longer than 3 months after the dialysis beginning (n = 1504). PAD, peripheral artery disease; CVD, cardiovascular disease.

Figure 1.



Figure 1. Flow chart of patients with end-stage kidney disease through this observational study. Only patients who became stable and were discharged from the hospital with consent were included. Patients who were not discharged and died in the hospital were excluded.

254x190mm (300 x 300 DPI)

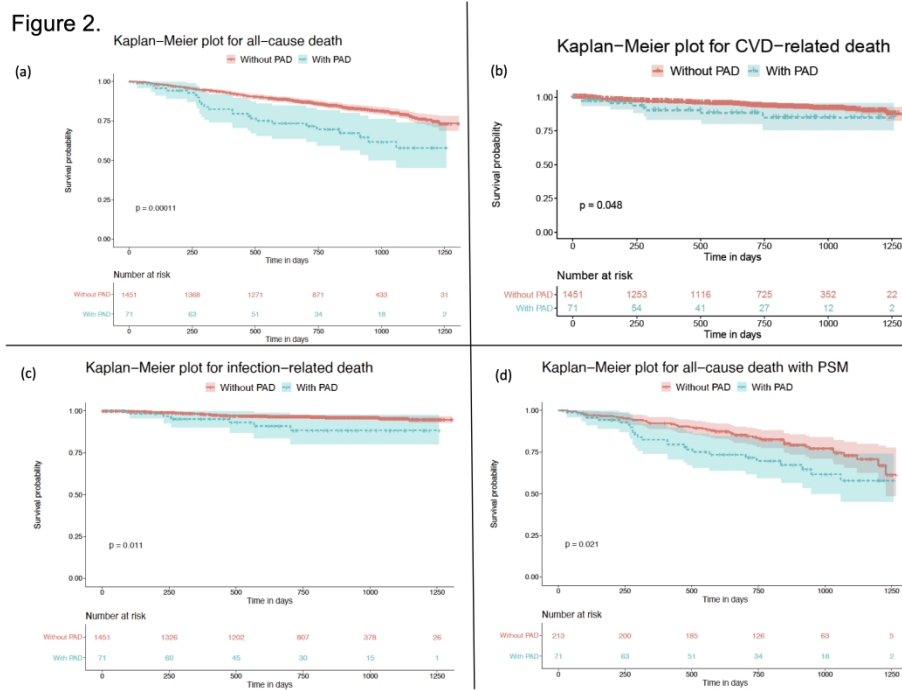

Figure 2. Kaplan-Meier plots. (a) all-cause death in patients (n = 1522) who started dialysis. (b) CVD-related death in patients (n = 1522) who started dialysis. (c) infection-related death in patients (n = 1522) who started dialysis. (d) all-cause death in propensity score-matched patients (n = 284) with and without PAD who started dialysis. CVD, cardiovascular disease; PAD, peripheral artery disease; PSM, propensity score matching.

296x209mm (300 x 300 DPI)

Figure 3.

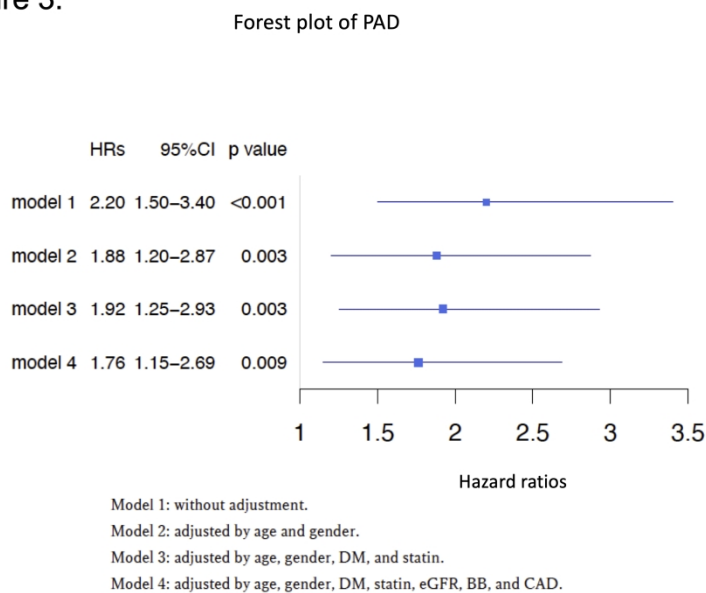

Figure 3. Hazard ratio of PAD for all-cause death. HR, hazard ratio; PAD, peripheral artery disease. CI, confidence interval; DM, diabetes mellitus; eGFR, estimated glomerular filtration rate; BB, beta-blocker; CAD, coronary artery disease.

296x209mm (300 x 300 DPI)

1  
2  
3 **Supplement material**  
4

5 **Peripheral artery disease at the time of dialysis initiation and mortality: a prospective**  
6  
7 **observational multicenter study**  
8  
9

10  
11  
12 Hikaru Morooka,<sup>1</sup> Akihito Tanaka,<sup>1</sup> Daijo Inaguma<sup>2</sup>, Shoichi Maruyama<sup>3</sup>  
13  
14

15  
16  
17 <sup>1</sup>Division of Nephrology, Nagoya University Hospital, Nagoya, Japan  
18

19 <sup>2</sup> Division of Nephrology, Fujita Health University School of Medicine, Toyoake, Japan  
20

21 <sup>3</sup>Division of Nephrology, Nagoya University Graduate School of Medicine, Nagoya, Japan  
22  
23  
24  
25  
26  
27  
28  
29  
30  
31  
32  
33  
34  
35  
36  
37  
38  
39  
40  
41  
42  
43  
44  
45  
46  
47  
48  
49  
50  
51  
52  
53  
54  
55  
56  
57  
58  
59  
60



Supplement material:

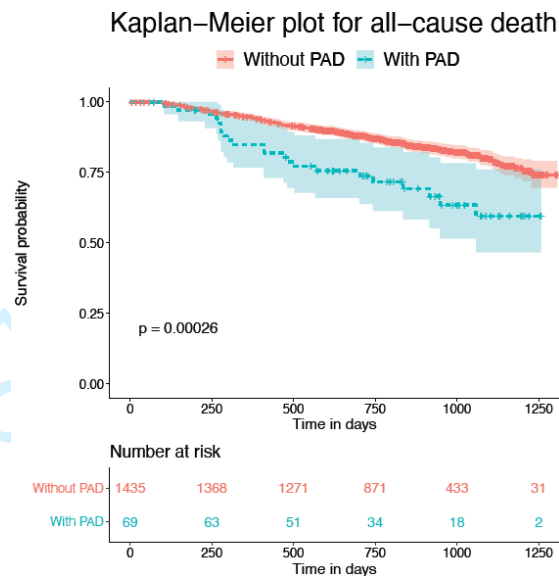

Supplemental figure 1:

The Kaplan-Meier plot for all-cause death for patients who survived longer than 3 months after the dialysis beginning (n = 1504). PAD, peripheral artery disease.

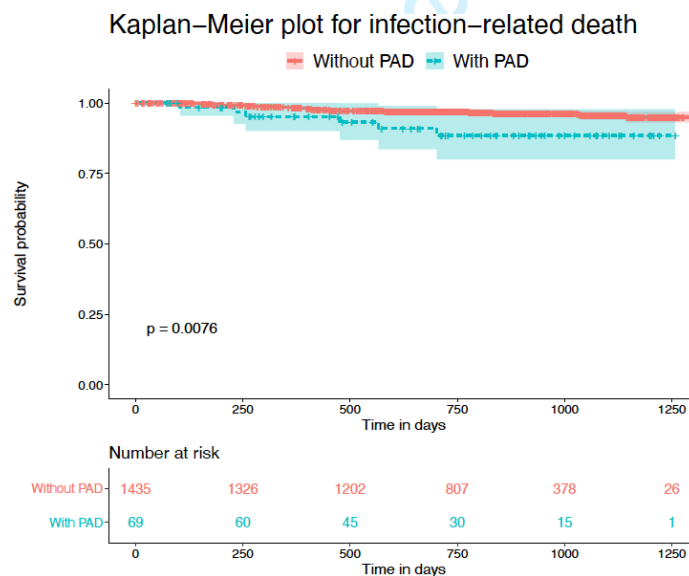

Supplemental figure 2:

The Kaplan-Meier plot for infection-related death for patients who survived longer than 3 months after the dialysis beginning (n = 1504). PAD, peripheral artery disease.

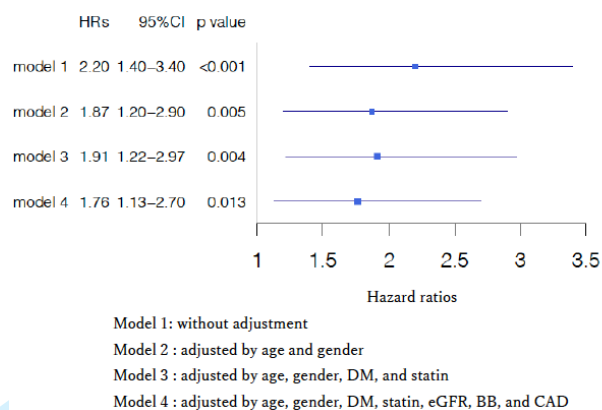

### Supplemental figure 3:

Hazard ratio of PAD for all-cause death in patients who survived longer than 3 months after the dialysis beginning (n = 1504). HR, hazard ratio; PAD, peripheral artery disease. CI, confidence interval; DM, diabetes mellitus; eGFR, estimated glomerular filtration rate; BB, beta-blocker; CAD, coronary artery disease.

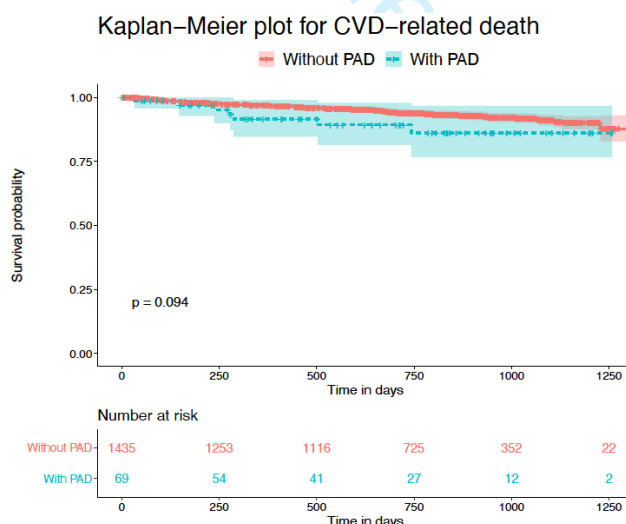

### Supplemental figure 4:

The Kaplan-Meier plot for CVD-related death for patients who survived longer than 3 months after the dialysis beginning (n = 1504). PAD, peripheral artery disease; CVD, cardiovascular disease.

Supplemental table 1: Hazard ratios of the mortality of the patients (n = 1522)

|         | HR (95% CI)        | P value |
|---------|--------------------|---------|
| Model 1 | 2.44 (1.32 – 4.51) | 0.004   |
| Model 2 | 2.62 (1.43 – 4.80) | 0.002   |
| Model 3 | 2.29 (1.27 – 4.12) | 0.006   |

Model 1: PAD

Model 2: PAD + pre SBP

Model 3: PAD + pre SBP + adjusted Calcium

CI; confidence interval. PAD; peripheral artery disease. SBP; systolic blood pressure

**STROBE 2007 (v4) Statement—Checklist of items that should be included in reports of *cohort studies***

| Section/Topic                | Item # | Recommendation                                                                                                                                                                       | Reported on page # |
|------------------------------|--------|--------------------------------------------------------------------------------------------------------------------------------------------------------------------------------------|--------------------|
| <b>Title and abstract</b>    | 1      | (a) Indicate the study's design with a commonly used term in the title or the abstract                                                                                               | 1-2                |
|                              |        | (b) Provide in the abstract an informative and balanced summary of what was done and what was found                                                                                  | 2                  |
| <b>Introduction</b>          |        |                                                                                                                                                                                      |                    |
| Background/rationale         | 2      | Explain the scientific background and rationale for the investigation being reported                                                                                                 | 4-5                |
| Objectives                   | 3      | State specific objectives, including any prespecified hypotheses                                                                                                                     | 4-5                |
| <b>Methods</b>               |        |                                                                                                                                                                                      |                    |
| Study design                 | 4      | Present key elements of study design early in the paper                                                                                                                              | 5-7                |
| Setting                      | 5      | Describe the setting, locations, and relevant dates, including periods of recruitment, exposure, follow-up, and data collection                                                      | 5-6                |
| Participants                 | 6      | (a) Give the eligibility criteria, and the sources and methods of selection of participants. Describe methods of follow-up                                                           | 5-6                |
|                              |        | (b) For matched studies, give matching criteria and number of exposed and unexposed                                                                                                  | 6-7                |
| Variables                    | 7      | Clearly define all outcomes, exposures, predictors, potential confounders, and effect modifiers. Give diagnostic criteria, if applicable                                             | 6                  |
| Data sources/<br>measurement | 8*     | For each variable of interest, give sources of data and details of methods of assessment (measurement). Describe comparability of assessment methods if there is more than one group | 5-6                |
| Bias                         | 9      | Describe any efforts to address potential sources of bias                                                                                                                            | 6-7                |
| Study size                   | 10     | Explain how the study size was arrived at                                                                                                                                            | 6                  |
| Quantitative variables       | 11     | Explain how quantitative variables were handled in the analyses. If applicable, describe which groupings were chosen and why                                                         | 6-7                |
| Statistical methods          | 12     | (a) Describe all statistical methods, including those used to control for confounding                                                                                                | 6-7                |
|                              |        | (b) Describe any methods used to examine subgroups and interactions                                                                                                                  | Not applicable     |
|                              |        | (c) Explain how missing data were addressed                                                                                                                                          | 7                  |
|                              |        | (d) If applicable, explain how loss to follow-up was addressed                                                                                                                       | 7, Figure 1        |
|                              |        | (e) Describe any sensitivity analyses                                                                                                                                                | Not applicable     |
| <b>Results</b>               |        |                                                                                                                                                                                      |                    |

|                          |     |                                                                                                                                                                                                              |                |
|--------------------------|-----|--------------------------------------------------------------------------------------------------------------------------------------------------------------------------------------------------------------|----------------|
| Participants             | 13* | (a) Report numbers of individuals at each stage of study—eg numbers potentially eligible, examined for eligibility, confirmed eligible, included in the study, completing follow-up, and analysed            | 7, Figure 1    |
|                          |     | (b) Give reasons for non-participation at each stage                                                                                                                                                         | 7, Figure 1    |
|                          |     | (c) Consider use of a flow diagram                                                                                                                                                                           | Figure 1       |
| Descriptive data         | 14* | (a) Give characteristics of study participants (eg demographic, clinical, social) and information on exposures and potential confounders                                                                     | Table 1        |
|                          |     | (b) Indicate number of participants with missing data for each variable of interest                                                                                                                          |                |
|                          |     | (c) Summarise follow-up time (eg, average and total amount)                                                                                                                                                  | 8              |
| Outcome data             | 15* | Report numbers of outcome events or summary measures over time                                                                                                                                               | Table 1        |
| Main results             | 16  | (a) Give unadjusted estimates and, if applicable, confounder-adjusted estimates and their precision (eg, 95% confidence interval). Make clear which confounders were adjusted for and why they were included | Figure 5       |
|                          |     | (b) Report category boundaries when continuous variables were categorized                                                                                                                                    | Not applicable |
|                          |     | (c) If relevant, consider translating estimates of relative risk into absolute risk for a meaningful time period                                                                                             | Not applicable |
| Other analyses           | 17  | Report other analyses done—eg analyses of subgroups and interactions, and sensitivity analyses                                                                                                               | Not applicable |
| <b>Discussion</b>        |     |                                                                                                                                                                                                              |                |
| Key results              | 18  | Summarise key results with reference to study objectives                                                                                                                                                     | 9              |
| <b>Limitations</b>       |     |                                                                                                                                                                                                              |                |
| Interpretation           | 20  | Give a cautious overall interpretation of results considering objectives, limitations, multiplicity of analyses, results from similar studies, and other relevant evidence                                   | 10             |
| Generalisability         | 21  | Discuss the generalisability (external validity) of the study results                                                                                                                                        | 10             |
| <b>Other information</b> |     |                                                                                                                                                                                                              |                |
| Funding                  | 22  | Give the source of funding and the role of the funders for the present study and, if applicable, for the original study on which the present article is based                                                | 12             |

\*Give information separately for cases and controls in case-control studies and, if applicable, for exposed and unexposed groups in cohort and cross-sectional studies.

**Note:** An Explanation and Elaboration article discusses each checklist item and gives methodological background and published examples of transparent reporting. The STROBE checklist is best used in conjunction with this article (freely available on the Web sites of PLoS Medicine at <http://www.plosmedicine.org/>, Annals of Internal Medicine at <http://www.annals.org/>, and Epidemiology at <http://www.epidem.com/>). Information on the STROBE Initiative is available at [www.strobe-statement.org](http://www.strobe-statement.org).
